# Supplementary material for: Human amygdala involvement in Alzheimer's disease revealed by stereological and dia‐PASEF analysis
Source: PubMed Central journal article supplement (PMC10467039; doi:10.1111/bpa.13180), 2023-06-18
Supplement: BPA-33-e13180-s001.pdf [file BPA-33-e13180-s001.pdf]

**Online Resource 6. Iba-1 stereological quantification data.**

**Table a.** Cortical nucleus Iba-1 stereological quantification data.

|                      | <i>Total Markers Counted</i> | <i>Number of Sections</i> | <i>Number of Sampling Sites</i> | <i>Coefficient of Error (Gundersen). m=1</i> | <i>Counting Frame Area (XY) (<math>\mu\text{m}^2</math>)</i> | <i>Sampling Grid Area (XY) (<math>\mu\text{m}^2</math>)</i> | <i>Estimated Population using Mean Section Thickness with Counts</i> | <i>Measured Volume (<math>\text{mm}^3</math>)</i> | <i>Numerical Density (<math>\text{cell}/\text{mm}^3</math>)</i> |
|----------------------|------------------------------|---------------------------|---------------------------------|----------------------------------------------|--------------------------------------------------------------|-------------------------------------------------------------|----------------------------------------------------------------------|---------------------------------------------------|-----------------------------------------------------------------|
| <b><i>AD</i></b>     |                              |                           |                                 |                                              |                                                              |                                                             |                                                                      |                                                   |                                                                 |
| 1                    | 173                          | 4                         | 88                              | 0.08                                         | 2500                                                         | 490000                                                      | 736846.50                                                            | 27.13                                             | 27162.54                                                        |
| 2                    | 132                          | 4                         | 151                             | 0.09                                         | 2500                                                         | 160000                                                      | 159178.75                                                            | 14.20                                             | 11212.30                                                        |
| 3                    | 143                          | 4                         | 148                             | 0.09                                         | 2500                                                         | 250000                                                      | 269946.19                                                            | 23.17                                             | 11649.68                                                        |
| 4                    | 145                          | 3                         | 69                              | 0.08                                         | 2500                                                         | 490000                                                      | 542024.00                                                            | 20.99                                             | 25823.83                                                        |
| 5                    | 178                          | 4                         | 98                              | 0.08                                         | 2500                                                         | 490000                                                      | 665370.50                                                            | 30.43                                             | 21867.05                                                        |
| 6                    | 129                          | 4                         | 58                              | 0.09                                         | 2500                                                         | 490000                                                      | 514952.00                                                            | 18.01                                             | 28592.72                                                        |
| 7                    | 255                          | 4                         | 146                             | 0.07                                         | 2500                                                         | 160000                                                      | 371721.81                                                            | 14.53                                             | 25587.46                                                        |
| 8                    | 192                          | 4                         | 68                              | 0.07                                         | 2500                                                         | 490000                                                      | 727029.56                                                            | 20.35                                             | 35721.88                                                        |
| 9                    | 147                          | 3                         | 400                             | 0.09                                         | 2500                                                         | 62500                                                       | 69674.70                                                             | 15.38                                             | 4529.07                                                         |
| 10                   | 182                          | 4                         | 66                              | 0.08                                         | 2500                                                         | 490000                                                      | 701052.75                                                            | 19.97                                             | 35112.50                                                        |
| <b><i>Non-AD</i></b> |                              |                           |                                 |                                              |                                                              |                                                             |                                                                      |                                                   |                                                                 |
| 20                   | 153                          | 4                         | 114                             | 0.08                                         | 2500                                                         | 490000                                                      | 578772.13                                                            | 33.84                                             | 17101.02                                                        |
| 21                   | 146                          | 3                         | 77                              | 0.09                                         | 2500                                                         | 490000                                                      | 516282.63                                                            | 22.74                                             | 22702.92                                                        |
| 22                   | 133                          | 3                         | 65                              | 0.1                                          | 2500                                                         | 490000                                                      | 458712.38                                                            | 19.52                                             | 23502.26                                                        |
| 23                   | 107                          | 4                         | 64                              | 0.1                                          | 2500                                                         | 490000                                                      | 402713.75                                                            | 19.81                                             | 20329.84                                                        |
| 24                   | 127                          | 4                         | 77                              | 0.09                                         | 2500                                                         | 490000                                                      | 461251.88                                                            | 23.26                                             | 19831.88                                                        |
| 25                   | 174                          | 4                         | 90                              | 0.08                                         | 2500                                                         | 490000                                                      | 676215.63                                                            | 26.83                                             | 25203.71                                                        |
| 26                   | 133                          | 4                         | 51                              | 0.09                                         | 2500                                                         | 640000                                                      | 640521.75                                                            | 20.84                                             | 30737.42                                                        |
| 27                   | 98                           | 4                         | 82                              | 0.1                                          | 2500                                                         | 490000                                                      | 347504.66                                                            | 23.96                                             | 14504.32                                                        |
| 28                   | 139                          | 4                         | 90                              | 0.09                                         | 2500                                                         | 490000                                                      | 572333.44                                                            | 28.02                                             | 20425.38                                                        |

**Table b.** Basomedial nucleus Iba-1 stereological quantification data.

|                      | <i>Total Markers Counted</i> | <i>Number of Sections</i> | <i>Number of Sampling Sites</i> | <i>Coefficient of Error (Gundersen). m=1</i> | <i>Counting Frame Area (XY) (<math>\mu\text{m}^2</math>)</i> | <i>Sampling Grid Area (XY) (<math>\mu\text{m}^2</math>)</i> | <i>Estimated Population using Mean Section Thickness with Counts</i> | <i>Measured Volume (<math>\text{mm}^3</math>)</i> | <i>Numerical Density (<math>\text{cell}/\text{mm}^3</math>)</i> |
|----------------------|------------------------------|---------------------------|---------------------------------|----------------------------------------------|--------------------------------------------------------------|-------------------------------------------------------------|----------------------------------------------------------------------|---------------------------------------------------|-----------------------------------------------------------------|
| <b><i>AD</i></b>     |                              |                           |                                 |                                              |                                                              |                                                             |                                                                      |                                                   |                                                                 |
| 1                    | 204                          | 4                         | 119                             | 0.07                                         | 2500                                                         | 490000                                                      | 859130.00                                                            | 36.76                                             | 23374.51                                                        |
| 2                    | 65                           | 4                         | 402                             | 0.12                                         | 2500                                                         | 62500                                                       | 38073.43                                                             | 9.84                                              | 3867.51                                                         |
| 3                    | 145                          | 4                         | 393                             | 0.09                                         | 2500                                                         | 62500                                                       | 67242.44                                                             | 15.08                                             | 4459.23                                                         |
| 4                    | 129                          | 4                         | 176                             | 0.09                                         | 2500                                                         | 250000                                                      | 237810.94                                                            | 27.76                                             | 8566.55                                                         |
| 5                    | 210                          | 4                         | 280                             | 0.07                                         | 2500                                                         | 160000                                                      | 247972.97                                                            | 28.42                                             | 8726.83                                                         |
| 6                    | 117                          | 4                         | 105                             | 0.1                                          | 2500                                                         | 160000                                                      | 160599.59                                                            | 10.07                                             | 15949.27                                                        |
| 7                    | 230                          | 4                         | 419                             | 0.07                                         | 2500                                                         | 40000                                                       | 79469.2                                                              | 10.10                                             | 7870.97                                                         |
| 8                    | 102                          | 4                         | 131                             | 0.1                                          | 2500                                                         | 160000                                                      | 119450.83                                                            | 13.18                                             | 9064.76                                                         |
| 9                    | 50                           | 4                         | 672                             | 0.14                                         | 2500                                                         | 40000                                                       | 14935.56                                                             | 16.68                                             | 895.37                                                          |
| 10                   | 251                          | 4                         | 143                             | 0.07                                         | 2500                                                         | 160000                                                      | 321709.19                                                            | 14.01                                             | 22969.38                                                        |
| <b><i>Non-AD</i></b> |                              |                           |                                 |                                              |                                                              |                                                             |                                                                      |                                                   |                                                                 |
| 19                   | 177                          | 3                         | 348                             | 0.08                                         | 2500                                                         | 40000                                                       | 49423.49                                                             | 8.51                                              | 5805.81                                                         |
| 20                   | 161                          | 4                         | 153                             | 0.08                                         | 2500                                                         | 360000                                                      | 447020.19                                                            | 34.26                                             | 13048.37                                                        |
| 21                   | 157                          | 3                         | 126                             | 0.08                                         | 2500                                                         | 360000                                                      | 411102.75                                                            | 28.73                                             | 14311.77                                                        |
| 22                   | 319                          | 4                         | 242                             | 0.06                                         | 2500                                                         | 250000                                                      | 666664.44                                                            | 37.82                                             | 17629.26                                                        |
| 23                   | 193                          | 4                         | 175                             | 0.08                                         | 2500                                                         | 160000                                                      | 236671.14                                                            | 17.59                                             | 13454.95                                                        |
| 24                   | 165                          | 4                         | 167                             | 0.08                                         | 2500                                                         | 160000                                                      | 202121.47                                                            | 16.19                                             | 12481.64                                                        |
| 25                   | 356                          | 4                         | 200                             | 0.06                                         | 2500                                                         | 160000                                                      | 454472.88                                                            | 20.08                                             | 22636.16                                                        |
| 26                   | 113                          | 4                         | 73                              | 0.1                                          | 2500                                                         | 490000                                                      | 404133.38                                                            | 21.54                                             | 18765.57                                                        |
| 27                   | 210                          | 4                         | 244                             | 0.07                                         | 2500                                                         | 90000                                                       | 136548.30                                                            | 13.66                                             | 9999.44                                                         |
| 28                   | 202                          | 4                         | 190                             | 0.08                                         | 2500                                                         | 160000                                                      | 260677.58                                                            | 19.09                                             | 13659.13                                                        |

**Table c.** Basolateral nucleus Iba-1 stereological quantification data.

|                      | <i>Total Markers Counted</i> | <i>Number of Sections</i> | <i>Number of Sampling Sites</i> | <i>Coefficient of Error (Gundersen). m=1</i> | <i>Counting Frame Area (XY) (<math>\mu\text{m}^2</math>)</i> | <i>Sampling Grid Area (XY) (<math>\mu\text{m}^2</math>)</i> | <i>Estimated Population using Mean Section Thickness with Counts</i> | <i>Measured Volume (<math>\text{mm}^3</math>)</i> | <i>Numerical Density (<math>\text{cell}/\text{mm}^3</math>)</i> |
|----------------------|------------------------------|---------------------------|---------------------------------|----------------------------------------------|--------------------------------------------------------------|-------------------------------------------------------------|----------------------------------------------------------------------|---------------------------------------------------|-----------------------------------------------------------------|
| <b><i>AD</i></b>     |                              |                           |                                 |                                              |                                                              |                                                             |                                                                      |                                                   |                                                                 |
| 1                    | 227                          | 4                         | 162                             | 0.07                                         | 2500                                                         | 640000                                                      | 1292839.75                                                           | 66.96                                             | 19308.36                                                        |
| 2                    | 101                          | 4                         | 450                             | 0.1                                          | 2500                                                         | 160000                                                      | 119363.00                                                            | 45.76                                             | 2608.56                                                         |
| 3                    | 179                          | 4                         | 236                             | 0.08                                         | 2500                                                         | 360000                                                      | 512909.00                                                            | 54.39                                             | 9431.44                                                         |
| 4                    | 165                          | 4                         | 310                             | 0.08                                         | 2500                                                         | 490000                                                      | 589492.75                                                            | 96.43                                             | 6113.21                                                         |
| 5                    | 212                          | 4                         | 195                             | 0.07                                         | 2500                                                         | 640000                                                      | 985542.88                                                            | 77.13                                             | 12777.52                                                        |
| 6                    | 96                           | 4                         | 79                              | 0.1                                          | 2500                                                         | 640000                                                      | 518432.44                                                            | 31.39                                             | 16518.90                                                        |
| 7                    | 164                          | 4                         | 215                             | 0.08                                         | 2500                                                         | 360000                                                      | 516745.75                                                            | 49.13                                             | 10519.08                                                        |
| 8                    | 149                          | 4                         | 119                             | 0.08                                         | 2500                                                         | 640000                                                      | 718690.31                                                            | 47.97                                             | 14983.20                                                        |
| 9                    | 82                           | 4                         | 1565                            | 0.12                                         | 2500                                                         | 62500                                                       | 39781.09                                                             | 61.18                                             | 650.24                                                          |
| 10                   | 186                          | 4                         | 119                             | 0.07                                         | 2500                                                         | 640000                                                      | 944113.63                                                            | 48.51                                             | 19462.73                                                        |
| <b><i>Non-AD</i></b> |                              |                           |                                 |                                              |                                                              |                                                             |                                                                      |                                                   |                                                                 |
| 19                   | 99                           | 4                         | 197                             | 0.1                                          | 2500                                                         | 490000                                                      | 342714.19                                                            | 59.44                                             | 5766.06                                                         |
| 20                   | 170                          | 4                         | 158                             | 0.08                                         | 2500                                                         | 1000000                                                     | 1301878.50                                                           | 103.46                                            | 12583.89                                                        |
| 21                   | 147                          | 4                         | 139                             | 0.09                                         | 2500                                                         | 810000                                                      | 848052.19                                                            | 71.47                                             | 11865.28                                                        |
| 22                   | 167                          | 4                         | 155                             | 0.08                                         | 2500                                                         | 640000                                                      | 901250.69                                                            | 62.69                                             | 14375.92                                                        |
| 23                   | 170                          | 4                         | 186                             | 0.08                                         | 2500                                                         | 640000                                                      | 836201.94                                                            | 75.90                                             | 11016.86                                                        |
| 24                   | 181                          | 4                         | 164                             | 0.08                                         | 2500                                                         | 640000                                                      | 922348.19                                                            | 65.75                                             | 14027.98                                                        |
| 25                   | 231                          | 4                         | 139                             | 0.07                                         | 2500                                                         | 640000                                                      | 1207363.88                                                           | 56.95                                             | 21200.42                                                        |
| 26                   | 185                          | 4                         | 182                             | 0.08                                         | 2500                                                         | 640000                                                      | 862383.25                                                            | 71.49                                             | 12062.45                                                        |
| 27                   | 132                          | 4                         | 137                             | 0.09                                         | 2500                                                         | 640000                                                      | 629054.56                                                            | 55.16                                             | 11405.05                                                        |
| 28                   | 189                          | 4                         | 194                             | 0.08                                         | 2500                                                         | 640000                                                      | 1046232.81                                                           | 77.09                                             | 13572.37                                                        |

**Table d.** Lateral nucleus Iba-1 stereological quantification data.

|                      | <i>Total Markers Counted</i> | <i>Number of Sections</i> | <i>Number of Sampling Sites</i> | <i>Coefficient of Error (Gundersen). m=1</i> | <i>Counting Frame Area (XY) (<math>\mu\text{m}^2</math>)</i> | <i>Sampling Grid Area (XY) (<math>\mu\text{m}^2</math>)</i> | <i>Estimated Population using Mean Section Thickness with Counts</i> | <i>Measured Volume (<math>\text{mm}^3</math>)</i> | <i>Numerical Density (<math>\text{cell}/\text{mm}^3</math>)</i> |
|----------------------|------------------------------|---------------------------|---------------------------------|----------------------------------------------|--------------------------------------------------------------|-------------------------------------------------------------|----------------------------------------------------------------------|---------------------------------------------------|-----------------------------------------------------------------|
| <b><i>AD</i></b>     |                              |                           |                                 |                                              |                                                              |                                                             |                                                                      |                                                   |                                                                 |
| 1                    | 355                          | 4                         | 199                             | 0.06                                         | 2500                                                         | 490000                                                      | 1490826.25                                                           | 63.43                                             | 23503.93                                                        |
| 2                    | 130                          | 4                         | 272                             | 0.09                                         | 2500                                                         | 490000                                                      | 479929.84                                                            | 85.46                                             | 5615.78                                                         |
| 3                    | 119                          | 4                         | 185                             | 0.1                                          | 2500                                                         | 490000                                                      | 499261.28                                                            | 58.33                                             | 8559.86                                                         |
| 4                    | 179                          | 4                         | 183                             | 0.08                                         | 2500                                                         | 1000000                                                     | 1287462.25                                                           | 115.00                                            | 11195.62                                                        |
| 5                    | 280                          | 4                         | 175                             | 0.06                                         | 2500                                                         | 810000                                                      | 1655242.13                                                           | 90.48                                             | 18294.44                                                        |
| 6                    | 147                          | 4                         | 224                             | 0.09                                         | 2500                                                         | 810000                                                      | 1035313.19                                                           | 113.39                                            | 9130.79                                                         |
| 7                    | 159                          | 4                         | 247                             | 0.08                                         | 2500                                                         | 810000                                                      | 1181195.13                                                           | 127.62                                            | 9255.27                                                         |
| 8                    | 167                          | 4                         | 294                             | 0.08                                         | 2500                                                         | 490000                                                      | 653026.13                                                            | 90.35                                             | 7228.06                                                         |
| 9                    | 21                           | 4                         | 2174                            | 0.23                                         | 2500                                                         | 62500                                                       | 10775.45                                                             | 86.11                                             | 125.14                                                          |
| 10                   | 243                          | 4                         | 187                             | 0.07                                         | 2500                                                         | 810000                                                      | 1716095.25                                                           | 97.34                                             | 17629.13                                                        |
| <b><i>Non-AD</i></b> |                              |                           |                                 |                                              |                                                              |                                                             |                                                                      |                                                   |                                                                 |
| 19                   | 116                          | 4                         | 585                             | 0.1                                          | 2500                                                         | 360000                                                      | 291832.94                                                            | 133.64                                            | 2183.69                                                         |
| 20                   | 289                          | 4                         | 310                             | 0.06                                         | 2500                                                         | 810000                                                      | 1816474.00                                                           | 159.90                                            | 11360.06                                                        |
| 21                   | 127                          | 4                         | 177                             | 0.09                                         | 2500                                                         | 810000                                                      | 730847.75                                                            | 91.42                                             | 7994.84                                                         |
| 22                   | 183                          | 4                         | 158                             | 0.08                                         | 2500                                                         | 810000                                                      | 1251328.50                                                           | 84.08                                             | 14883.36                                                        |
| 23                   | 223                          | 4                         | 244                             | 0.07                                         | 2500                                                         | 810000                                                      | 1366829.88                                                           | 125.01                                            | 10934.11                                                        |
| 24                   | 284                          | 4                         | 262                             | 0.06                                         | 2500                                                         | 810000                                                      | 1863937.38                                                           | 135.36                                            | 13770.73                                                        |
| 25                   | 227                          | 4                         | 190                             | 0.07                                         | 2500                                                         | 810000                                                      | 1562544.50                                                           | 98.03                                             | 15939.40                                                        |
| 26                   | 115                          | 4                         | 664                             | 0.09                                         | 2500                                                         | 360000                                                      | 307634.94                                                            | 153.23                                            | 2007.68                                                         |
| 27                   | 122                          | 4                         | 197                             | 0.09                                         | 2500                                                         | 810000                                                      | 749247.19                                                            | 105.01                                            | 7135.55                                                         |
| 28                   | 214                          | 4                         | 218                             | 0.08                                         | 2500                                                         | 810000                                                      | 1508911.00                                                           | 111.07                                            | 13585.23                                                        |
