# Supplementary material for: Human amygdala involvement in Alzheimer's disease revealed by stereological and dia‐PASEF analysis
Source: PubMed Central journal article supplement (PMC10467039; doi:10.1111/bpa.13180), 2023-06-18
Supplement: BPA-33-e13180-s002.pdf [file BPA-33-e13180-s002.pdf]

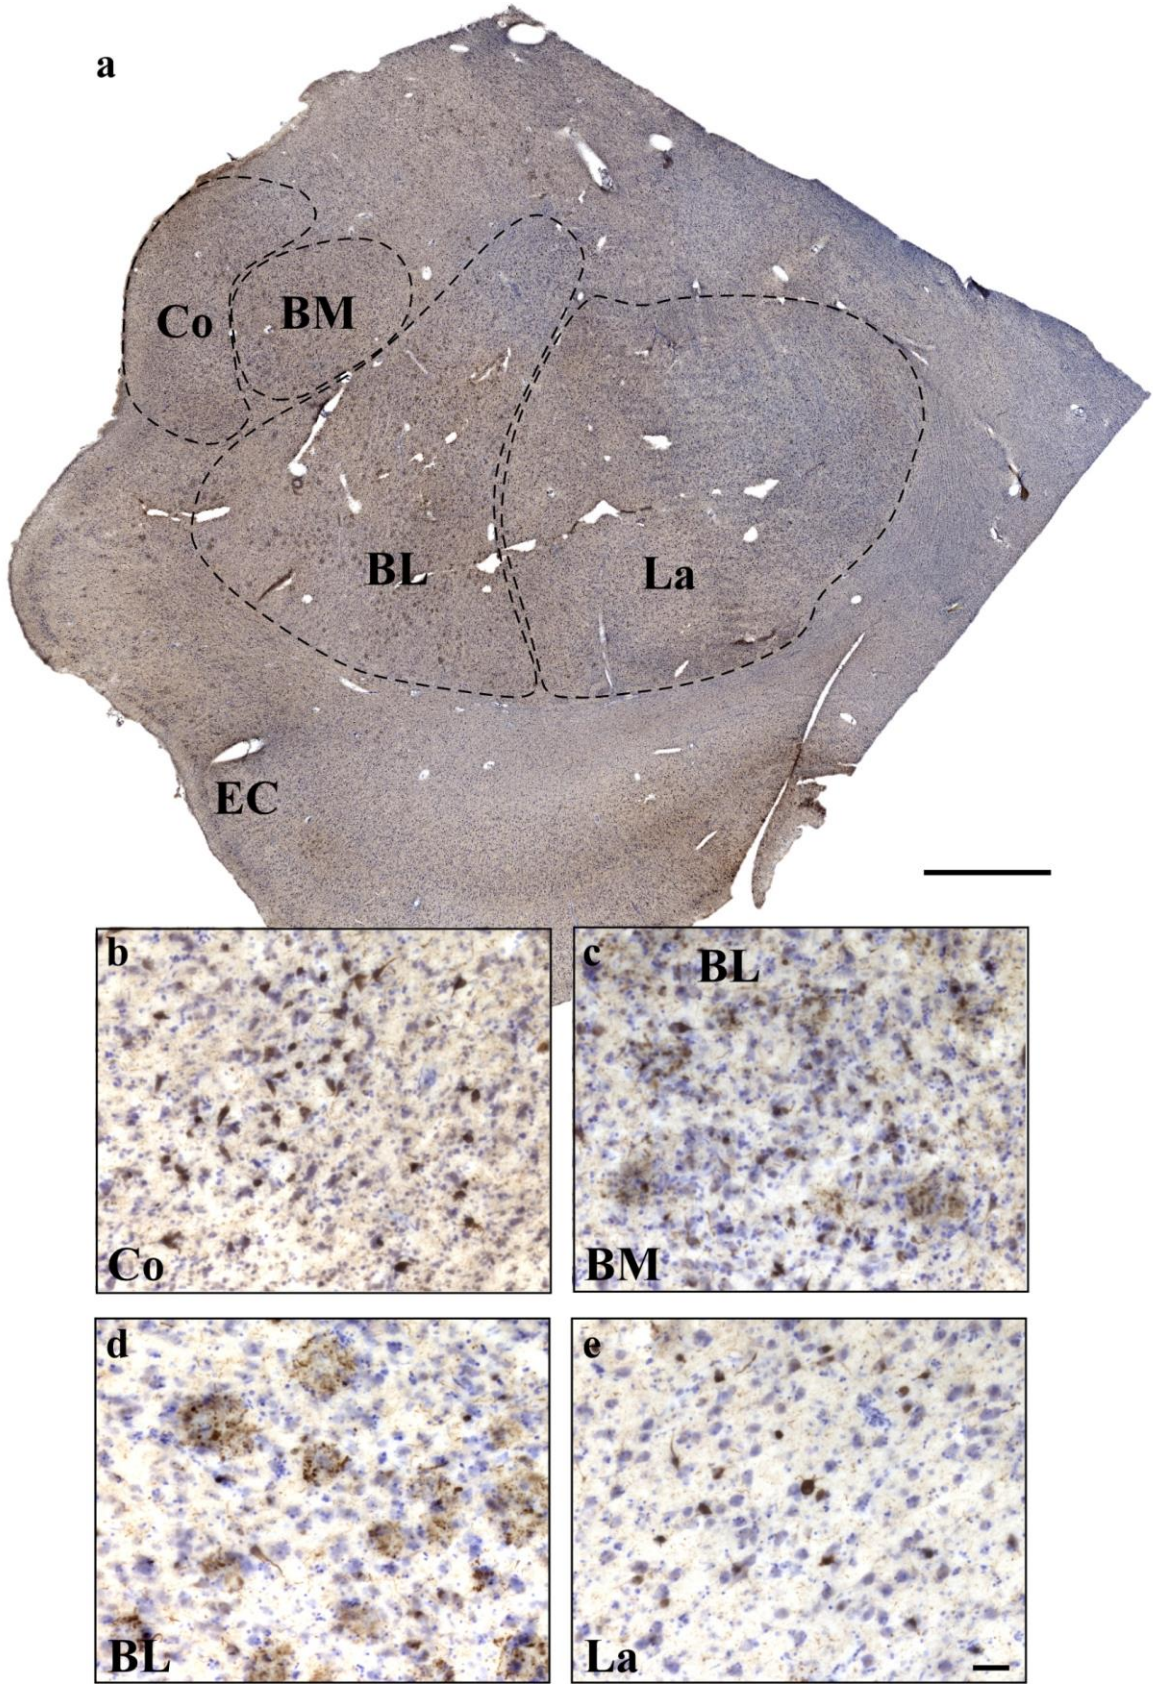

**Online Resource 10** *Phosphorylated TDP-43 (TDP-43-P) deposits in amygdala in AD.* (a) Immunohistochemistry against TDP-43-P in AC in AD (case 2). Note different deposition pattern between nuclei. (b) Abundant cellular accumulations of TDP-43-P can be observed in Co, while in (c) BM and (d) BL TDP-43-P appears in clusters. In contrast, (e) scarce deposits are in La. Co: Cortical nucleus, BM: Basomedial nucleus, BL: Basolateral nucleus, La: Lateral nucleus, EC: Entorhinal cortex. Scale bar = 1000  $\mu\text{m}$  in (a); and 50  $\mu\text{m}$  in (b, c, d, e)
