# Supplementary material for: Human amygdala involvement in Alzheimer's disease revealed by stereological and dia‐PASEF analysis
Source: PubMed Central journal article supplement (PMC10467039; doi:10.1111/bpa.13180), 2023-06-18
Supplement: BPA-33-e13180-s003.pdf [file BPA-33-e13180-s003.pdf]

**Online Resource 5. MAP2 stereological quantification data.**

**Table a.** Cortical nucleus MAP2 stereological quantification data.

|                      | <i>Total Markers Counted</i> | <i>Number of Sections</i> | <i>Number of Sampling Sites</i> | <i>Coefficient of Error (Gundersen), m=1</i> | <i>Counting Frame Area (XY) (<math>\mu\text{m}^2</math>)</i> | <i>Sampling Grid Area (XY) (<math>\mu\text{m}^2</math>)</i> | <i>Estimated Population using Mean Section Thickness with Counts</i> | <i>Measured Volume (<math>\text{mm}^3</math>)</i> | <i>Numerical Density (<math>\text{cell}/\text{mm}^3</math>)</i> |
|----------------------|------------------------------|---------------------------|---------------------------------|----------------------------------------------|--------------------------------------------------------------|-------------------------------------------------------------|----------------------------------------------------------------------|---------------------------------------------------|-----------------------------------------------------------------|
| <b><i>AD</i></b>     |                              |                           |                                 |                                              |                                                              |                                                             |                                                                      |                                                   |                                                                 |
| <i>1</i>             | 112                          | 4                         | 88                              | 0.1                                          | 2500                                                         | 422500                                                      | 394694.53                                                            | 24.28                                             | 16254.01                                                        |
| <i>2</i>             | 108                          | 4                         | 288                             | 0.1                                          | 2500                                                         | 90000                                                       | 73292.08                                                             | 15.52                                             | 4721.55                                                         |
| <i>3</i>             | 152                          | 4                         | 143                             | 0.08                                         | 2500                                                         | 250000                                                      | 289765.19                                                            | 21.70                                             | 13350.28                                                        |
| <i>4</i>             | 129                          | 3                         | 110                             | 0.09                                         | 2500                                                         | 250000                                                      | 247576.38                                                            | 17.57                                             | 14093.99                                                        |
| <i>5</i>             | 124                          | 4                         | 96                              | 0.09                                         | 2500                                                         | 490000                                                      | 444362.19                                                            | 30.25                                             | 14691.75                                                        |
| <i>6</i>             | 150                          | 4                         | 97                              | 0.08                                         | 2500                                                         | 250000                                                      | 293173.09                                                            | 15.26                                             | 19192.62                                                        |
| <i>7</i>             | 157                          | 4                         | 273                             | 0.08                                         | 2500                                                         | 90000                                                       | 110737.77                                                            | 15.24                                             | 7267.07                                                         |
| <i>8</i>             | 113                          | 4                         | 137                             | 0.1                                          | 2500                                                         | 250000                                                      | 221105.17                                                            | 20.80                                             | 10630.01                                                        |
| <i>9</i>             | 101                          | 3                         | 147                             | 0.1                                          | 2500                                                         | 160000                                                      | 130745.18                                                            | 14.21                                             | 9201.38                                                         |
| <i>10</i>            | 167                          | 4                         | 190                             | 0.08                                         | 2500                                                         | 160000                                                      | 205463.66                                                            | 19.07                                             | 10775.71                                                        |
| <b><i>Non-AD</i></b> |                              |                           |                                 |                                              |                                                              |                                                             |                                                                      |                                                   |                                                                 |
| <i>19</i>            | 116                          | 3                         | 145                             | 0.1                                          | 2500                                                         | 250000                                                      | 213860.66                                                            | 22.67                                             | 9439.18                                                         |
| <i>20</i>            | 101                          | 4                         | 123                             | 0.1                                          | 2500                                                         | 360000                                                      | 302574.28                                                            | 26.34                                             | 11489.17                                                        |
| <i>21</i>            | 116                          | 4                         | 106                             | 0.1                                          | 2500                                                         | 490000                                                      | 430013.44                                                            | 31.27                                             | 13753.65                                                        |
| <i>22</i>            | 103                          | 4                         | 81                              | 0.1                                          | 2500                                                         | 490000                                                      | 418217.88                                                            | 23.52                                             | 17781.45                                                        |
| <i>23</i>            | 110                          | 3                         | 123                             | 0.1                                          | 2500                                                         | 202500                                                      | 189030.59                                                            | 15.76                                             | 11992.35                                                        |
| <i>24</i>            | 139                          | 3                         | 135                             | 0.09                                         | 2500                                                         | 250000                                                      | 259529.88                                                            | 21.17                                             | 12260.25                                                        |
| <i>25</i>            | 131                          | 4                         | 146                             | 0.09                                         | 2500                                                         | 302500                                                      | 283811.31                                                            | 27.61                                             | 10278.62                                                        |
| <i>26</i>            | 155                          | 4                         | 178                             | 0.09                                         | 2500                                                         | 160000                                                      | 186132.25                                                            | 17.59                                             | 10583.09                                                        |
| <i>27</i>            | 125                          | 4                         | 145                             | 0.09                                         | 2500                                                         | 250000                                                      | 240961.75                                                            | 23.29                                             | 10347.92                                                        |
| <i>28</i>            | 144                          | 4                         | 212                             | 0.09                                         | 2500                                                         | 160000                                                      | 170364.2                                                             | 21.12                                             | 8065.57                                                         |

**Table b.** Basomedial nucleus MAP2 stereological quantification data.

|                      | <i>Total Markers Counted</i> | <i>Number of Sections</i> | <i>Number of Sampling Sites</i> | <i>Coefficient of Error (Gundersen), m=1</i> | <i>Counting Frame Area (XY) (<math>\mu\text{m}^2</math>)</i> | <i>Sampling Grid Area (XY) (<math>\mu\text{m}^2</math>)</i> | <i>Estimated Population using Mean Section Thickness with Counts</i> | <i>Measured Volume (<math>\text{mm}^3</math>)</i> | <i>Numerical Density (<math>\text{cell}/\text{mm}^3</math>)</i> |
|----------------------|------------------------------|---------------------------|---------------------------------|----------------------------------------------|--------------------------------------------------------------|-------------------------------------------------------------|----------------------------------------------------------------------|---------------------------------------------------|-----------------------------------------------------------------|
| <b><i>AD</i></b>     |                              |                           |                                 |                                              |                                                              |                                                             |                                                                      |                                                   |                                                                 |
| 1                    | 111                          | 4                         | 126                             | 0.1                                          | 2500                                                         | 422500                                                      | 385302.28                                                            | 32.37                                             | 11903.32                                                        |
| 2                    | 119                          | 4                         | 386                             | 0.09                                         | 2500                                                         | 40000                                                       | 35245.73                                                             | 9.45                                              | 3729.94                                                         |
| 3                    | 130                          | 4                         | 192                             | 0.09                                         | 2500                                                         | 122500                                                      | 123984.94                                                            | 14.65                                             | 8463.71                                                         |
| 4                    | 118                          | 3                         | 167                             | 0.1                                          | 2500                                                         | 202500                                                      | 178202.28                                                            | 21.57                                             | 8261.04                                                         |
| 5                    | 110                          | 4                         | 177                             | 0.1                                          | 2500                                                         | 250000                                                      | 203860.36                                                            | 27.31                                             | 7464.35                                                         |
| 6                    | 163                          | 4                         | 87                              | 0.1                                          | 2500                                                         | 202500                                                      | 255476                                                               | 10.51                                             | 24315.76                                                        |
| 7                    | 119                          | 4                         | 175                             | 0.09                                         | 2500                                                         | 90000                                                       | 84338.17                                                             | 9.56                                              | 8818.94                                                         |
| 8                    | 123                          | 4                         | 174                             | 0.09                                         | 2500                                                         | 160000                                                      | 152522.8                                                             | 17.09                                             | 8922.44                                                         |
| 9                    | 113                          | 4                         | 197                             | 0.1                                          | 2500                                                         | 160000                                                      | 140746.66                                                            | 19.23                                             | 7318.89                                                         |
| 10                   | 155                          | 4                         | 188                             | 0.08                                         | 2500                                                         | 122500                                                      | 145845.09                                                            | 14.17                                             | 10295.58                                                        |
| <b><i>Non-AD</i></b> |                              |                           |                                 |                                              |                                                              |                                                             |                                                                      |                                                   |                                                                 |
| 19                   | 135                          | 3                         | 113                             | 0.09                                         | 2500                                                         | 160000                                                      | 164289.08                                                            | 11.31                                             | 14523.048                                                       |
| 20                   | 109                          | 4                         | 131                             | 0.1                                          | 2500                                                         | 422500                                                      | 374113.41                                                            | 35.96                                             | 10404.79                                                        |
| 21                   | 143                          | 4                         | 186                             | 0.09                                         | 2500                                                         | 360000                                                      | 394873.69                                                            | 41.35                                             | 9548.71                                                         |
| 22                   | 100                          | 4                         | 134                             | 0.1                                          | 2500                                                         | 422500                                                      | 346532.41                                                            | 36.43                                             | 9513.61                                                         |
| 23                   | 133                          | 3                         | 193                             | 0.09                                         | 2500                                                         | 90000                                                       | 102527.88                                                            | 10.87                                             | 9432.88                                                         |
| 24                   | 114                          | 3                         | 125                             | 0.1                                          | 2500                                                         | 160000                                                      | 135421.84                                                            | 12.64                                             | 10717.91                                                        |
| 25                   | 162                          | 4                         | 171                             | 0.08                                         | 2500                                                         | 202500                                                      | 236446.69                                                            | 21.77                                             | 10859.98                                                        |
| 26                   | 108                          | 4                         | 133                             | 0.1                                          | 2500                                                         | 250000                                                      | 212750.58                                                            | 20.14                                             | 10564.27                                                        |
| 27                   | 111                          | 4                         | 145                             | 0.1                                          | 2500                                                         | 160000                                                      | 136084.52                                                            | 13.91                                             | 9782.58                                                         |
| 28                   | 142                          | 4                         | 261                             | 0.09                                         | 2500                                                         | 90000                                                       | 95347.59                                                             | 14.64                                             | 6513.21                                                         |

**Table c.** Basolateral nucleus MAP2 stereological quantification data.

|                      | <i>Total Markers Counted</i> | <i>Number of Sections</i> | <i>Number of Sampling Sites</i> | <i>Coefficient of Error (Gundersen). m=1</i> | <i>Counting Frame Area (XY) (<math>\mu\text{m}^2</math>)</i> | <i>Sampling Grid Area (XY) (<math>\mu\text{m}^2</math>)</i> | <i>Estimated Population using Mean Section Thickness with Counts</i> | <i>Measured Volume (<math>\text{mm}^3</math>)</i> | <i>Numerical Density (<math>\text{cell}/\text{mm}^3</math>)</i> |
|----------------------|------------------------------|---------------------------|---------------------------------|----------------------------------------------|--------------------------------------------------------------|-------------------------------------------------------------|----------------------------------------------------------------------|---------------------------------------------------|-----------------------------------------------------------------|
| <b><i>AD</i></b>     |                              |                           |                                 |                                              |                                                              |                                                             |                                                                      |                                                   |                                                                 |
| <i>1</i>             | 145                          | 4                         | 131                             | 0.09                                         | 2500                                                         | 810000                                                      | 985157.5                                                             | 66.45                                             | 14826.06                                                        |
| <i>2</i>             | 104                          | 4                         | 138                             | 0.1                                          | 2500                                                         | 490000                                                      | 377298.13                                                            | 42.7                                              | 8835.69                                                         |
| <i>3</i>             | 171                          | 4                         | 105                             | 0.08                                         | 2500                                                         | 810000                                                      | 1069707.5                                                            | 52.85                                             | 20241.63                                                        |
| <i>4</i>             | 199                          | 3                         | 190                             | 0.08                                         | 2500                                                         | 640000                                                      | 944027.19                                                            | 77.74                                             | 12142.81                                                        |
| <i>5</i>             | 204                          | 4                         | 145                             | 0.07                                         | 2500                                                         | 810000                                                      | 1276813.38                                                           | 74.42                                             | 17157.07                                                        |
| <i>6</i>             | 244                          | 4                         | 153                             | 0.07                                         | 2500                                                         | 360000                                                      | 697555.56                                                            | 34.09                                             | 20463.02                                                        |
| <i>7</i>             | 132                          | 4                         | 127                             | 0.09                                         | 2500                                                         | 640000                                                      | 688230.31                                                            | 50.27                                             | 13690.16                                                        |
| <i>8</i>             | 129                          | 4                         | 140                             | 0.09                                         | 2500                                                         | 640000                                                      | 650518.75                                                            | 58.19                                             | 11180.03                                                        |
| <i>9</i>             | 152                          | 4                         | 158                             | 0.08                                         | 2500                                                         | 640000                                                      | 786815.81                                                            | 64.31                                             | 12235.46                                                        |
| <i>10</i>            | 170                          | 4                         | 135                             | 0.08                                         | 2500                                                         | 640000                                                      | 847953.94                                                            | 54.02                                             | 15696.19                                                        |
| <b><i>Non-AD</i></b> |                              |                           |                                 |                                              |                                                              |                                                             |                                                                      |                                                   |                                                                 |
| <i>19</i>            | 129                          | 4                         | 127                             | 0.09                                         | 2500                                                         | 902500                                                      | 907650.63                                                            | 72.42                                             | 12533.5                                                         |
| <i>20</i>            | 157                          | 4                         | 159                             | 0.08                                         | 2500                                                         | 1000000                                                     | 1304295.5                                                            | 100.78                                            | 12941.75                                                        |
| <i>21</i>            | 152                          | 4                         | 174                             | 0.08                                         | 2500                                                         | 640000                                                      | 764007.13                                                            | 70.72                                             | 10803.42                                                        |
| <i>22</i>            | 144                          | 4                         | 148                             | 0.08                                         | 2500                                                         | 640000                                                      | 760779.69                                                            | 58.17                                             | 13078.27                                                        |
| <i>23</i>            | 164                          | 4                         | 205                             | 0.08                                         | 2500                                                         | 640000                                                      | 909977.06                                                            | 82.43                                             | 11039.5                                                         |
| <i>24</i>            | 136                          | 3                         | 94                              | 0.09                                         | 2500                                                         | 810000                                                      | 819915.38                                                            | 47.97                                             | 17091.22                                                        |
| <i>25</i>            | 136                          | 4                         | 157                             | 0.09                                         | 2500                                                         | 640000                                                      | 652387.31                                                            | 62.07                                             | 10510.48                                                        |
| <i>26</i>            | 140                          | 4                         | 172                             | 0.09                                         | 2500                                                         | 640000                                                      | 715445.88                                                            | 71.23                                             | 10044.39                                                        |
| <i>27</i>            | 147                          | 4                         | 135                             | 0.09                                         | 2500                                                         | 640000                                                      | 723738.19                                                            | 52.94                                             | 13671.87                                                        |
| <i>28</i>            | 181                          | 4                         | 167                             | 0.08                                         | 2500                                                         | 490000                                                      | 678444.38                                                            | 51.82                                             | 13093.14                                                        |

**Table d.** Lateral nucleus MAP2 stereological quantification data.

|                      | <i>Total Markers Counted</i> | <i>Number of Sections</i> | <i>Number of Sampling Sites</i> | <i>Coefficient of Error (Gundersen), m=1</i> | <i>Counting Frame Area (XY) (<math>\mu\text{m}^2</math>)</i> | <i>Sampling Grid Area (XY) (<math>\mu\text{m}^2</math>)</i> | <i>Estimated Population using Mean Section Thickness with Counts</i> | <i>Measured Volume (<math>\text{mm}^3</math>)</i> | <i>Numerical Density (<math>\text{cell}/\text{mm}^3</math>)</i> |
|----------------------|------------------------------|---------------------------|---------------------------------|----------------------------------------------|--------------------------------------------------------------|-------------------------------------------------------------|----------------------------------------------------------------------|---------------------------------------------------|-----------------------------------------------------------------|
| <b><i>AD</i></b>     |                              |                           |                                 |                                              |                                                              |                                                             |                                                                      |                                                   |                                                                 |
| 1                    | 202                          | 4                         | 194                             | 0.08                                         | 2500                                                         | 490000                                                      | 826188.75                                                            | 61.36                                             | 13465.54                                                        |
| 2                    | 103                          | 4                         | 159                             | 0.1                                          | 2500                                                         | 810000                                                      | 637139.63                                                            | 80.46                                             | 7918.76                                                         |
| 3                    | 110                          | 4                         | 127                             | 0.1                                          | 2500                                                         | 810000                                                      | 719345.13                                                            | 64.67                                             | 11123.7                                                         |
| 4                    | 119                          | 3                         | 135                             | 0.1                                          | 2500                                                         | 1000000                                                     | 883924.75                                                            | 87.37                                             | 10117.47                                                        |
| 5                    | 126                          | 4                         | 131                             | 0.09                                         | 2500                                                         | 1000000                                                     | 936630.38                                                            | 81.22                                             | 11531.59                                                        |
| 6                    | 173                          | 4                         | 178                             | 0.08                                         | 2500                                                         | 1000000                                                     | 1377568.88                                                           | 113.18                                            | 12171.49                                                        |
| 7                    | 165                          | 4                         | 230                             | 0.08                                         | 2500                                                         | 810000                                                      | 1064196.5                                                            | 118.94                                            | 8947.11                                                         |
| 8                    | 149                          | 4                         | 164                             | 0.08                                         | 2500                                                         | 1000000                                                     | 1136516.38                                                           | 104.83                                            | 10841.62                                                        |
| 9                    | 187                          | 4                         | 300                             | 0.08                                         | 2500                                                         | 490000                                                      | 781073.25                                                            | 92.77                                             | 8419.24                                                         |
| 10                   | 160                          | 4                         | 154                             | 0.09                                         | 2500                                                         | 1000000                                                     | 1247521.63                                                           | 97.44                                             | 12802.6                                                         |
| <b><i>Non-AD</i></b> |                              |                           |                                 |                                              |                                                              |                                                             |                                                                      |                                                   |                                                                 |
| 19                   | 150                          | 4                         | 229                             | 0.08                                         | 2500                                                         | 1000000                                                     | 1176397.63                                                           | 144.75                                            | 8126.93                                                         |
| 20                   | 154                          | 4                         | 185                             | 0.08                                         | 2500                                                         | 1440000                                                     | 1795137.75                                                           | 166.66                                            | 10771.13                                                        |
| 21                   | 117                          | 4                         | 156                             | 0.09                                         | 2500                                                         | 810000                                                      | 730959.75                                                            | 79.35                                             | 9211.72                                                         |
| 22                   | 138                          | 3                         | 143                             | 0.09                                         | 2500                                                         | 640000                                                      | 701847.75                                                            | 58.54                                             | 11988.48                                                        |
| 23                   | 162                          | 4                         | 219                             | 0.08                                         | 2500                                                         | 1000000                                                     | 1406385.25                                                           | 140.31                                            | 10023.27                                                        |
| 24                   | 111                          | 3                         | 136                             | 0.1                                          | 2500                                                         | 1440000                                                     | 1010442.56                                                           | 99.94                                             | 10110.97                                                        |
| 25                   | 107                          | 4                         | 125                             | 0.1                                          | 2500                                                         | 1440000                                                     | 1046146.38                                                           | 93.77                                             | 11155.97                                                        |
| 26                   | 113                          | 4                         | 99                              | 0.1                                          | 2500                                                         | 2560000                                                     | 2371849.75                                                           | 161.75                                            | 14663.68                                                        |
| 27                   | 183                          | 4                         | 188                             | 0.08                                         | 2500                                                         | 810000                                                      | 1126587.5                                                            | 98.89                                             | 11392.81                                                        |
| 28                   | 141                          | 4                         | 150                             | 0.09                                         | 2500                                                         | 1000000                                                     | 1119092.25                                                           | 94.77                                             | 11809.11                                                        |
