# Supplementary material for: Human amygdala involvement in Alzheimer's disease revealed by stereological and dia‐PASEF analysis
Source: PubMed Central journal article supplement (PMC10467039; doi:10.1111/bpa.13180), 2023-06-18
Supplement: BPA-33-e13180-s004.pdf [file BPA-33-e13180-s004.pdf]

### Online Resource 3. Volume data.

**Table a.** Estimated amygdaloid complex volume.

|                      | <i>Coefficient of<br/>Error<br/>(Gundersen).<br/><math>m=1</math></i> | <i>Sections</i> | <i>Grid<br/>Size<br/>(<math>\mu\text{m}</math>)</i> | <i>Volume<br/>Corrected for<br/>OverProjection<br/>(<math>\text{mm}^3</math>)</i> |
|----------------------|-----------------------------------------------------------------------|-----------------|-----------------------------------------------------|-----------------------------------------------------------------------------------|
| <b><i>AD</i></b>     |                                                                       |                 |                                                     |                                                                                   |
| 1                    | 0.024                                                                 | 4               | 500                                                 | 230.01                                                                            |
| 2                    | 0.022                                                                 | 4               | 500                                                 | 175.18                                                                            |
| 3                    | 0.025                                                                 | 4               | 500                                                 | 172.33                                                                            |
| 4                    | 0.03                                                                  | 3               | 500                                                 | 235.89                                                                            |
| 5                    | 0.022                                                                 | 4               | 500                                                 | 257.09                                                                            |
| 6                    | 0.023                                                                 | 4               | 500                                                 | 180.03                                                                            |
| 7                    | 0.021                                                                 | 4               | 250                                                 | 234.13                                                                            |
| 8                    | 0.023                                                                 | 4               | 500                                                 | 218.10                                                                            |
| 9                    | 0.025                                                                 | 4               | 500                                                 | 215.80                                                                            |
| 10                   | 0.023                                                                 | 4               | 500                                                 | 210.538                                                                           |
| <b><i>Non-AD</i></b> |                                                                       |                 |                                                     |                                                                                   |
| 19                   | 0.021                                                                 | 4               | 500                                                 | 277.46                                                                            |
| 20                   | 0.023                                                                 | 4               | 500                                                 | 404.43                                                                            |
| 21                   | 0.021                                                                 | 4               | 500                                                 | 273.11                                                                            |
| 22                   | 0.024                                                                 | 4               | 500                                                 | 253.11                                                                            |
| 23                   | 0.023                                                                 | 4               | 500                                                 | 274.73                                                                            |
| 24                   | 0.022                                                                 | 4               | 250                                                 | 267.76                                                                            |
| 25                   | 0.024                                                                 | 4               | 500                                                 | 249.23                                                                            |
| 26                   | 0.023                                                                 | 4               | 500                                                 | 276.03                                                                            |
| 27                   | 0.024                                                                 | 4               | 500                                                 | 232.99                                                                            |
| 28                   | 0.023                                                                 | 4               | 500                                                 | 281.98                                                                            |

**Table b.** Estimated cortical nucleus volume.

|               | <i>Coefficient of Error (Gundersen).<br/>m=1</i> | <i>Sections</i> | <i>Grid Size (<math>\mu\text{m}</math>)</i> | <i>Volume Corrected for OverProjection (<math>\text{mm}^3</math>)</i> |
|---------------|--------------------------------------------------|-----------------|---------------------------------------------|-----------------------------------------------------------------------|
| <i>AD</i>     |                                                  |                 |                                             |                                                                       |
| 1             | 0.026                                            | 4               | 500                                         | 34.34                                                                 |
| 2             | 0.032                                            | 4               | 500                                         | 17.16                                                                 |
| 3             | 0.032                                            | 4               | 500                                         | 25.66                                                                 |
| 4             | 0.034                                            | 3               | 500                                         | 19.25                                                                 |
| 5             | 0.025                                            | 4               | 500                                         | 32.78                                                                 |
| 6             | 0.031                                            | 4               | 500                                         | 17.84                                                                 |
| 7             | 0.025                                            | 4               | 250                                         | 18.23                                                                 |
| 8             | 0.03                                             | 4               | 500                                         | 24.76                                                                 |
| 9             | 0.032                                            | 4               | 500                                         | 21.71                                                                 |
| 10            | 0.029                                            | 4               | 500                                         | 21.91                                                                 |
| <i>Non-AD</i> |                                                  |                 |                                             |                                                                       |
| 19            | 0.032                                            | 3               | 500                                         | 31.76                                                                 |
| 20            | 0.026                                            | 4               | 500                                         | 38.66                                                                 |
| 21            | 0.026                                            | 4               | 500                                         | 37.58                                                                 |
| 22            | 0.025                                            | 4               | 500                                         | 33.43                                                                 |
| 23            | 0.027                                            | 4               | 500                                         | 22.44                                                                 |
| 24            | 0.019                                            | 4               | 250                                         | 32.02                                                                 |
| 25            | 0.024                                            | 4               | 500                                         | 31.78                                                                 |
| 26            | 0.032                                            | 4               | 500                                         | 19.13                                                                 |
| 27            | 0.027                                            | 4               | 500                                         | 26.41                                                                 |
| 28            | 0.024                                            | 4               | 250                                         | 31.39                                                                 |

**Table c.** Estimated basolateral complex volume.

|               | <i>Coefficient of<br/>Error<br/>(Gundersen).<br/>m=1</i> | <i>Sections</i> | <i>Grid<br/>Size<br/>(<math>\mu\text{m}</math>)</i> | <i>Volume<br/>Corrected for<br/>OverProjection<br/>(<math>\text{mm}^3</math>)</i> |
|---------------|----------------------------------------------------------|-----------------|-----------------------------------------------------|-----------------------------------------------------------------------------------|
| <i>AD</i>     |                                                          |                 |                                                     |                                                                                   |
| 1             | 0.025                                                    | 4               | 500                                                 | 192.46                                                                            |
| 2             | 0.022                                                    | 4               | 500                                                 | 154.61                                                                            |
| 3             | 0.025                                                    | 4               | 500                                                 | 144.15                                                                            |
| 4             | 0.03                                                     | 3               | 500                                                 | 213.30                                                                            |
| 5             | 0.023                                                    | 4               | 500                                                 | 219.19                                                                            |
| 6             | 0.023                                                    | 4               | 500                                                 | 158.06                                                                            |
| 7             | 0.021                                                    | 4               | 250                                                 | 212.95                                                                            |
| 8             | 0.023                                                    | 4               | 500                                                 | 188.53                                                                            |
| 9             | 0.025                                                    | 4               | 500                                                 | 189.79                                                                            |
| 10            | 0.023                                                    | 4               | 500                                                 | 185.44                                                                            |
| <i>Non-AD</i> |                                                          |                 |                                                     |                                                                                   |
| 19            | 0.03                                                     | 4               | 500                                                 | 237.54                                                                            |
| 20            | 0.023                                                    | 4               | 500                                                 | 358.55                                                                            |
| 21            | 0.021                                                    | 4               | 500                                                 | 230.73                                                                            |
| 22            | 0.025                                                    | 4               | 500                                                 | 216.93                                                                            |
| 23            | 0.024                                                    | 4               | 500                                                 | 249.69                                                                            |
| 24            | 0.023                                                    | 4               | 250                                                 | 231.58                                                                            |
| 25            | 0.025                                                    | 4               | 500                                                 | 214.95                                                                            |
| 26            | 0.023                                                    | 4               | 500                                                 | 254.38                                                                            |
| 27            | 0.024                                                    | 4               | 500                                                 | 201.79                                                                            |
| 28            | 0.023                                                    | 4               | 250                                                 | 247.02                                                                            |

**Table d.** Estimated basomedial nucleus volume.

|               | <i>Coefficient of Error (Gundersen).<br/>m=1</i> | <i>Sections</i> | <i>Grid Size (<math>\mu\text{m}</math>)</i> | <i>Volume Corrected for OverProjection (<math>\text{mm}^3</math>)</i> |
|---------------|--------------------------------------------------|-----------------|---------------------------------------------|-----------------------------------------------------------------------|
| <i>AD</i>     |                                                  |                 |                                             |                                                                       |
| 1             | 0.025                                            | 4               | 500                                         | 42.21                                                                 |
| 2             | 0.036                                            | 4               | 500                                         | 11.75                                                                 |
| 3             | 0.032                                            | 4               | 500                                         | 15.69                                                                 |
| 4             | 0.041                                            | 3               | 500                                         | 25.59                                                                 |
| 5             | 0.027                                            | 4               | 500                                         | 30.05                                                                 |
| 6             | 0.041                                            | 4               | 500                                         | 10.51                                                                 |
| 7             | 0.028                                            | 4               | 250                                         | 11.32                                                                 |
| 8             | 0.033                                            | 4               | 500                                         | 15.89                                                                 |
| 9             | 0.036                                            | 4               | 500                                         | 19.03                                                                 |
| 10            | 0.034                                            | 4               | 500                                         | 16.61                                                                 |
| <i>Non-AD</i> |                                                  |                 |                                             |                                                                       |
| 19            | 0.033                                            | 4               | 500                                         | 15.90                                                                 |
| 20            | 0.028                                            | 4               | 500                                         | 39.08                                                                 |
| 21            | 0.023                                            | 4               | 500                                         | 49.66                                                                 |
| 22            | 0.024                                            | 4               | 500                                         | 44.68                                                                 |
| 23            | 0.033                                            | 4               | 500                                         | 20.15                                                                 |
| 24            | 0.021                                            | 4               | 250                                         | 16.45                                                                 |
| 25            | 0.03                                             | 4               | 500                                         | 23.68                                                                 |
| 26            | 0.029                                            | 4               | 500                                         | 21.15                                                                 |
| 27            | 0.031                                            | 4               | 500                                         | 15.65                                                                 |
| 28            | 0.026                                            | 4               | 250                                         | 20.21                                                                 |

**Table e.** Estimated basolateral nucleus volume.

|               | <i>Coefficient of Error (Gundersen).<br/>m=1</i> | <i>Sections</i> | <i>Grid Size (<math>\mu\text{m}</math>)</i> | <i>Volume Corrected for OverProjection (<math>\text{mm}^3</math>)</i> |
|---------------|--------------------------------------------------|-----------------|---------------------------------------------|-----------------------------------------------------------------------|
| <i>AD</i>     |                                                  |                 |                                             |                                                                       |
| 1             | 0.026                                            | 4               | 500                                         | 80.59                                                                 |
| 2             | 0.026                                            | 4               | 500                                         | 49.41                                                                 |
| 3             | 0.027                                            | 4               | 500                                         | 57.80                                                                 |
| 4             | 0.03                                             | 3               | 500                                         | 83.00                                                                 |
| 5             | 0.022                                            | 4               | 500                                         | 87.01                                                                 |
| 6             | 0.031                                            | 4               | 500                                         | 30.31                                                                 |
| 7             | 0.026                                            | 4               | 250                                         | 54.10                                                                 |
| 8             | 0.028                                            | 4               | 500                                         | 58.90                                                                 |
| 9             | 0.027                                            | 4               | 500                                         | 69.63                                                                 |
| 10            | 0.027                                            | 4               | 500                                         | 56.08                                                                 |
| <i>Non-AD</i> |                                                  |                 |                                             |                                                                       |
| 19            | 0.026                                            | 4               | 500                                         | 77.33                                                                 |
| 20            | 0.024                                            | 4               | 500                                         | 113.80                                                                |
| 21            | 0.025                                            | 4               | 500                                         | 76.90                                                                 |
| 22            | 0.024                                            | 4               | 500                                         | 69.90                                                                 |
| 23            | 0.025                                            | 4               | 500                                         | 81.05                                                                 |
| 24            | 0.025                                            | 4               | 250                                         | 68.93                                                                 |
| 25            | 0.024                                            | 4               | 500                                         | 67.46                                                                 |
| 26            | 0.029                                            | 4               | 500                                         | 70.61                                                                 |
| 27            | 0.032                                            | 4               | 500                                         | 62.23                                                                 |
| 28            | 0.022                                            | 4               | 250                                         | 90.19                                                                 |

**Table f.** Estimated lateral nucleus volume.

|               | <i>Coefficient of Error (Gundersen).<br/>m=1</i> | <i>Sections</i> | <i>Grid Size (<math>\mu\text{m}</math>)</i> | <i>Volume Corrected for OverProjection (<math>\text{mm}^3</math>)</i> |
|---------------|--------------------------------------------------|-----------------|---------------------------------------------|-----------------------------------------------------------------------|
| <i>AD</i>     |                                                  |                 |                                             |                                                                       |
| 1             | 0.03                                             | 4               | 500                                         | 66.64                                                                 |
| 2             | 0.023                                            | 4               | 500                                         | 89.64                                                                 |
| 3             | 0.027                                            | 4               | 500                                         | 66.93                                                                 |
| 4             | 0.03                                             | 3               | 500                                         | 99.89                                                                 |
| 5             | 0.026                                            | 4               | 500                                         | 97.48                                                                 |
| 6             | 0.023                                            | 4               | 500                                         | 113.09                                                                |
| 7             | 0.02                                             | 4               | 250                                         | 143.14                                                                |
| 8             | 0.022                                            | 4               | 500                                         | 108.98                                                                |
| 9             | 0.025                                            | 4               | 500                                         | 96.18                                                                 |
| 10            | 0.023                                            | 4               | 500                                         | 109.55                                                                |
| <i>Non-AD</i> |                                                  |                 |                                             |                                                                       |
| 19            | 0.024                                            | 4               | 500                                         | 137.09                                                                |
| 20            | 0.023                                            | 4               | 500                                         | 194.80                                                                |
| 21            | 0.02                                             | 4               | 500                                         | 100.03                                                                |
| 22            | 0.029                                            | 4               | 500                                         | 98.83                                                                 |
| 23            | 0.024                                            | 4               | 500                                         | 141.81                                                                |
| 24            | 0.022                                            | 4               | 250                                         | 141.02                                                                |
| 25            | 0.027                                            | 4               | 500                                         | 119.01                                                                |
| 26            | 0.022                                            | 4               | 500                                         | 157.09                                                                |
| 27            | 0.022                                            | 4               | 500                                         | 118.85                                                                |
| 28            | 0.026                                            | 4               | 250                                         | 129.43                                                                |
