# Supplementary material for: Human amygdala involvement in Alzheimer's disease revealed by stereological and dia‐PASEF analysis
Source: PubMed Central journal article supplement (PMC10467039; doi:10.1111/bpa.13180), 2023-06-18
Supplement: BPA-33-e13180-s005.pdf [file BPA-33-e13180-s005.pdf]

## LC-MS/MS

Samples were separated with the predefined 60 sample per day method (21 min gradient time, 200 ng peptides), on a reverse-phase analytical column 8 cm x 150  $\mu\text{m}$ , C18 1.5  $\mu\text{m}$  (EV1109) heated to 40 °C. Mobile phases were H<sub>2</sub>O and acetonitrile, buffered with 0.1% formic acid (LC-MS grade, Thermo Fisher Scientific).

The acquisition modes recording spectra from 475 to 1,000 m/z. Ion mobility resolution was calibrated with three Agilent ESI-L Tuning Mix ions (mass spectra, ion mobility: 622.0289 m/z, 0.9848 Vs cm<sup>-2</sup>; 922.0097 m/z, 1.1895 Vs cm<sup>-2</sup>; 1221.9906 m/z, 1.3820 Vs cm<sup>-2</sup>) and set to 0.85-1.30 Vs/cm<sup>-2</sup>. DdaPASEF consisted of four PASEF MS/MS. The accumulation of ions and the ramp times parallel to the scans were 100 ms, with a total cycle time of 0.53 s. Any individually charged ions were excluded from MS/MS analysis. Moreover, precursors that reached the target value of 20,000 were excluded for 0.4 min. A Q window of  $\pm 2$  Da for m/z <700 and  $\pm 3$  Da for m/z >800 was used for isolating precursors. The 12 most intense ions were fragmented. For diaPASEF, 21 non-overlapping windows of 25 Da were set, making a total cycle time of 0.95 s. The collision energy was decreased linearly from 45 eV at ion mobility of 1.30 Vs cm<sup>-2</sup> to 27 eV at 0.85 Vs cm<sup>-2</sup> in both ddaPASEF and diaPASEF methods.
