# Supplementary material for: Human amygdala involvement in Alzheimer's disease revealed by stereological and dia‐PASEF analysis
Source: PubMed Central journal article supplement (PMC10467039; doi:10.1111/bpa.13180), 2023-06-18
Supplement: BPA-33-e13180-s006.pdf [file BPA-33-e13180-s006.pdf]

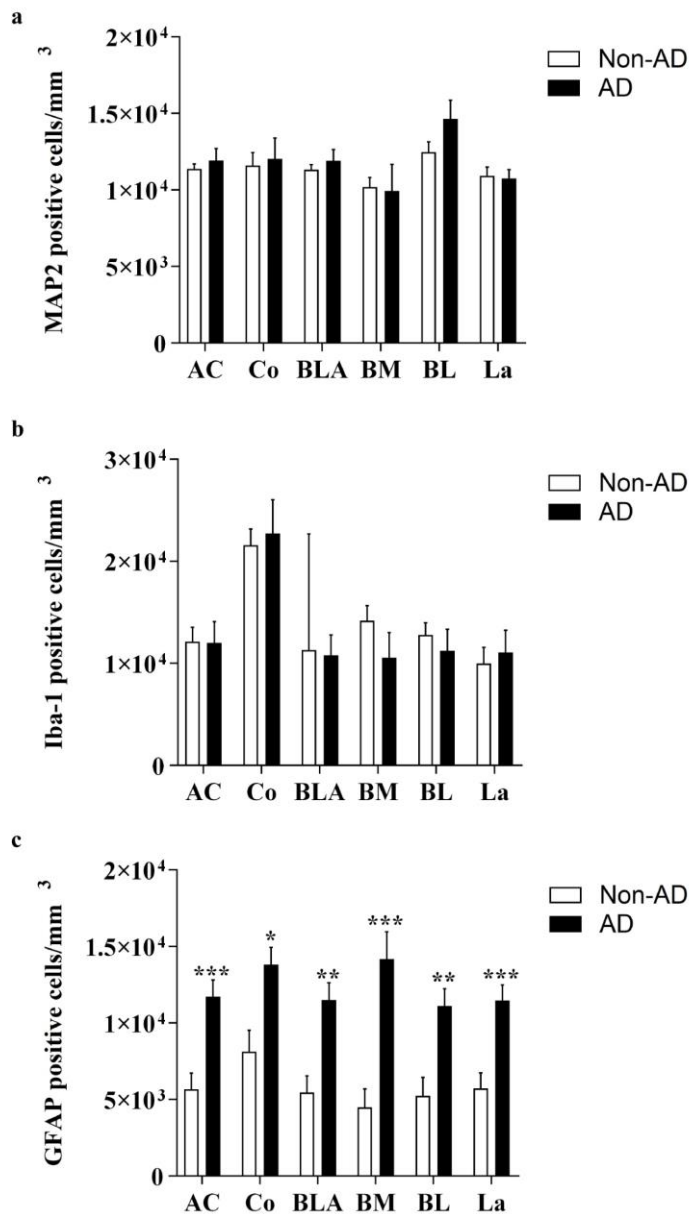

**Online Resource 4** *Increased astroglia density in the amygdaloid nuclei in AD.* The MAP2-positive cells/mm<sup>3</sup> (a), Iba-1-positive cells/mm<sup>3</sup> (b) and GFAP-positive cells/mm<sup>3</sup> (c) in the global AC and the different nuclei are shown (the graphs show the mean  $\pm$  SEM, \* p value < 0.05, \*\* p value < 0.01, \*\*\* p value < 0.001). AC: Amygdaloid complex (Co, BLA), Co: Cortical nucleus, BLA: Basolateral complex (BM, BL, La), BM: Basomedial nucleus, BL: Basolateral nucleus, La: Lateral nucleus.
