# Supplementary material for: Human amygdala involvement in Alzheimer's disease revealed by stereological and dia‐PASEF analysis
Source: PubMed Central journal article supplement (PMC10467039; doi:10.1111/bpa.13180), 2023-06-18
Supplement: BPA-33-e13180-s007.pdf [file BPA-33-e13180-s007.pdf]

**Online Resource 9. Tau stereological quantification data.**

**Table a.** Cortical nucleus Tau stereological quantification data.

|                  | <i>Marker Count</i> | <i>Number of Sections</i> | <i>Number of Sampling Sites</i> | <i>Coefficient of Error (Gundersen). m=1</i> | <i>Counting Frame Area (XY) (<math>\mu\text{m}^2</math>)</i> | <i>Sampling Grid Area (XY) (<math>\mu\text{m}^2</math>)</i> | <i>Grid Spacing (<math>\mu\text{m}</math>)</i> | <i>Area Fraction</i> |
|------------------|---------------------|---------------------------|---------------------------------|----------------------------------------------|--------------------------------------------------------------|-------------------------------------------------------------|------------------------------------------------|----------------------|
| <b><i>AD</i></b> |                     |                           |                                 |                                              |                                                              |                                                             |                                                |                      |
| <i>1</i>         | 40                  | 4                         | 11                              | 0.06                                         | 10000                                                        | 4000000                                                     | 20                                             | 0.1695               |
| <i>2</i>         | 47                  | 3                         | 11                              | 0.056                                        | 10000                                                        | 2250000                                                     | 20                                             | 0.1992               |
| <i>3</i>         | 50                  | 4                         | 9                               | 0.047                                        | 10000                                                        | 4000000                                                     | 20                                             | 0.2315               |
| <i>4</i>         | 46                  | 3                         | 7                               | 0.049                                        | 10000                                                        | 4000000                                                     | 20                                             | 0.2805               |
| <i>5</i>         | 68                  | 4                         | 8                               | 0.04                                         | 10000                                                        | 9000000                                                     | 20                                             | 0.34                 |
| <i>6</i>         | 45                  | 3                         | 6                               | 0.048                                        | 10000                                                        | 4000000                                                     | 20                                             | 0.3                  |
| <i>7</i>         | 67                  | 4                         | 14                              | 0.045                                        | 10000                                                        | 2250000                                                     | 20                                             | 0.2134               |
| <i>8</i>         | 36                  | 4                         | 6                               | 0.069                                        | 10000                                                        | 4000000                                                     | 20                                             | 0.3243               |
| <i>9</i>         | 67                  | 3                         | 14                              | 0.064                                        | 10000                                                        | 4000000                                                     | 20                                             | 0.3028               |
| <i>10</i>        | 74                  | 4                         | 11                              | 0.038                                        | 10000                                                        | 4000000                                                     | 20                                             | 0.3122               |

**Table b.** Basomedial nucleus Tau stereological quantification data.

|           | <i>Marker Count</i> | <i>Number of Sections</i> | <i>Number of Sampling Sites</i> | <i>Coefficient of Error (Gundersen). m=1</i> | <i>Counting Frame Area (XY) (<math>\mu\text{m}^2</math>)</i> | <i>Sampling Grid Area (XY) (<math>\mu\text{m}^2</math>)</i> | <i>Grid Spacing (<math>\mu\text{m}</math>)</i> | <i>Area Fraction</i> |
|-----------|---------------------|---------------------------|---------------------------------|----------------------------------------------|--------------------------------------------------------------|-------------------------------------------------------------|------------------------------------------------|----------------------|
| <i>AD</i> |                     |                           |                                 |                                              |                                                              |                                                             |                                                |                      |
| 1         | 64                  | 4                         | 11                              | 0.038                                        | 10000                                                        | 6250000                                                     | 20                                             | 0.2327               |
| 2         | 67                  | 4                         | 13                              | 0.055                                        | 10000                                                        | 1440000                                                     | 20                                             | 0.2094               |
| 3         | 43                  | 4                         | 8                               | 0.053                                        | 10000                                                        | 2250000                                                     | 20                                             | 0.215                |
| 4         | 45                  | 3                         | 7                               | 0.066                                        | 10000                                                        | 6250000                                                     | 20                                             | 0.2903               |
| 5         | 25                  | 4                         | 7                               | 0.041                                        | 10000                                                        | 9000000                                                     | 20                                             | 0.1667               |
| 6         | 43                  | 4                         | 7                               | 0.073                                        | 10000                                                        | 2250000                                                     | 20                                             | 0.3071               |
| 7         | 71                  | 4                         | 18                              | 0.035                                        | 10000                                                        | 1000000                                                     | 20                                             | 0.1578               |
| 8         | 23                  | 4                         | 4                               | 0.086                                        | 10000                                                        | 6250000                                                     | 20                                             | 0.2614               |
| 9         | 71                  | 4                         | 18                              | 0.065                                        | 10000                                                        | 4000000                                                     | 20                                             | 0.1799               |
| 10        | 35                  | 4                         | 6                               | 0.062                                        | 10000                                                        | 9000000                                                     | 20                                             | 0.2333               |

**Table c.** Basolateral nucleus Tau stereological quantification data.

|                  | <i>Marker Count</i> | <i>Number of Sections</i> | <i>Number of Sampling Sites</i> | <i>Coefficient of Error (Gundersen). <math>m=1</math></i> | <i>Counting Frame Area (XY) (<math>\mu\text{m}^2</math>)</i> | <i>Sampling Grid Area (XY) (<math>\mu\text{m}^2</math>)</i> | <i>Grid Spacing (<math>\mu\text{m}</math>)</i> | <i>Area Fraction</i> |
|------------------|---------------------|---------------------------|---------------------------------|-----------------------------------------------------------|--------------------------------------------------------------|-------------------------------------------------------------|------------------------------------------------|----------------------|
| <b><i>AD</i></b> |                     |                           |                                 |                                                           |                                                              |                                                             |                                                |                      |
| <i>1</i>         | 44                  | 4                         | 17                              | 0.056                                                     | 10000                                                        | 6250000                                                     | 20                                             | 0.1183               |
| <i>2</i>         | 81                  | 4                         | 13                              | 0.035                                                     | 10000                                                        | 6250000                                                     | 20                                             | 0.2492               |
| <i>3</i>         | 72                  | 4                         | 17                              | 0.038                                                     | 10000                                                        | 6250000                                                     | 20                                             | 0.1946               |
| <i>4</i>         | 50                  | 3                         | 15                              | 0.054                                                     | 10000                                                        | 9000000                                                     | 20                                             | 0.1618               |
| <i>5</i>         | 79                  | 4                         | 17                              | 0.088                                                     | 10000                                                        | 6250000                                                     | 20                                             | 0.238                |
| <i>6</i>         | 52                  | 4                         | 6                               | 0.047                                                     | 10000                                                        | 9000000                                                     | 20                                             | 0.3467               |
| <i>7</i>         | 47                  | 4                         | 12                              | 0.051                                                     | 10000                                                        | 6250000                                                     | 20                                             | 0.1649               |
| <i>8</i>         | 54                  | 4                         | 8                               | 0.046                                                     | 10000                                                        | 9000000                                                     | 20                                             | 0.27                 |
| <i>9</i>         | 47                  | 4                         | 12                              | 0.038                                                     | 10000                                                        | 9000000                                                     | 20                                             | 0.2527               |
| <i>10</i>        | 55                  | 4                         | 9                               | 0.062                                                     | 10000                                                        | 9000000                                                     | 20                                             | 0.2444               |

**Table d.** Lateral nucleus Tau stereological quantification data.

|                  | <i>Marker Count</i> | <i>Number of Sections</i> | <i>Number of Sampling Sites</i> | <i>Coefficient of Error (Gundersen). m=1</i> | <i>Counting Frame Area (XY) (<math>\mu\text{m}^2</math>)</i> | <i>Sampling Grid Area (XY) (<math>\mu\text{m}^2</math>)</i> | <i>Grid spacing (<math>\mu\text{m}</math>)</i> | <i>Area Fraction</i> |
|------------------|---------------------|---------------------------|---------------------------------|----------------------------------------------|--------------------------------------------------------------|-------------------------------------------------------------|------------------------------------------------|----------------------|
| <b><i>AD</i></b> |                     |                           |                                 |                                              |                                                              |                                                             |                                                |                      |
| <i>1</i>         | 86                  | 4                         | 19                              | 0.037                                        | 10000                                                        | 4000000                                                     | 20                                             | 0.1811               |
| <i>2</i>         | 36                  | 4                         | 17                              | 0.058                                        | 10000                                                        | 9000000                                                     | 20                                             | 0.0891               |
| <i>3</i>         | 39                  | 4                         | 16                              | 0.055                                        | 10000                                                        | 6250000                                                     | 20                                             | 0.1037               |
| <i>4</i>         | 76                  | 3                         | 16                              | 0.038                                        | 10000                                                        | 9000000                                                     | 20                                             | 0.1995               |
| <i>5</i>         | 61                  | 4                         | 13                              | 0.037                                        | 10000                                                        | 6250000                                                     | 20                                             | 0.1877               |
| <i>6</i>         | 71                  | 4                         | 22                              | 0.035                                        | 10000                                                        | 9000000                                                     | 20                                             | 0.1312               |
| <i>7</i>         | 28                  | 4                         | 14                              | 0.079                                        | 10000                                                        | 12250000                                                    | 20                                             | 0.08                 |
| <i>8</i>         | 80                  | 4                         | 24                              | 0.034                                        | 10000                                                        | 6250000                                                     | 20                                             | 0.1382               |
| <i>9</i>         | 28                  | 4                         | 14                              | 0.059                                        | 10000                                                        | 9000000                                                     | 20                                             | 0.095                |
| <i>10</i>        | 33                  | 4                         | 12                              | 0.06                                         | 10000                                                        | 12250000                                                    | 20                                             | 0.11                 |
