# Supplementary material for: Human amygdala involvement in Alzheimer's disease revealed by stereological and dia‐PASEF analysis
Source: PubMed Central journal article supplement (PMC10467039; doi:10.1111/bpa.13180), 2023-06-18
Supplement: BPA-33-e13180-s008.pdf [file BPA-33-e13180-s008.pdf]

**Online Resource 1. Antibodies detail.**

| Antigen                     | Antibody                           | Manufacturer   | Cat. N°    | Dilution | Blocking buffer          | Antibody dilution buffer |
|-----------------------------|------------------------------------|----------------|------------|----------|--------------------------|--------------------------|
| <b>Immunohistochemistry</b> |                                    |                |            |          |                          |                          |
| <b>MAP2</b>                 | Mouse anti-MAP2                    | Invitrogen     | 13-1500    | 1:500    | PBS- 0.4% Tx100- 3% NHS  | PBS- 0.4% Tx100- 3% NHS  |
| <b>Iba-1</b>                | Rabbit anti-Iba-1                  | Wako           | 019-19741  | 1:2,000  | PBS- 0.1% Tx100          | PBS- 0.1% Tx100          |
| <b>GFAP</b>                 | Rabbit anti-GFAP                   | Dako           | Z0334      | 1:10,000 | PBS- 0.1% Tx100- 10% NHS | PBS- 0.1% Tx100- 10% NHS |
| <b>A<math>\beta</math></b>  | Mouse anti- $\beta$ - amyloid      | Merck          | 05-831-I   | 1:5,000  | PBS- 0.3% Tx100- 5% NDS  | PBS- 0.3% Tx100          |
| <b>Tau</b>                  | Mouse anti- Tau                    | Cell Signaling | 4019       | 1:1600   | PBS- 0.3% Tx100- 5%NDS   | PBS- 0.3% Tx100          |
| <b>TDP-43-P</b>             | Rabbit anti- phosphorylated-TDP-43 | Invitrogen     | PA5-114661 | 1:100    | PBS- 0.3% Tx100- 5%NDS   | PBS- 0.3% Tx100- 5%NDS   |
| <b>Immunofluorescence</b>   |                                    |                |            |          |                          |                          |
| <b>MAP2</b>                 | Mouse anti-MAP2                    | Invitrogen     | 13-1500    | 1:100    | TBS- 0.3% Tx100- 10% NDS | TBS- 0.3% Tx100- 10% NDS |
| <b>Iba-1</b>                | Goat anti- Iba-1                   | Abcam          | ab5076     | 1:1,000  | TBS- 0.3% Tx100- 10% NDS | TBS- 0.3% Tx100- 10% NDS |
| <b>GFAP</b>                 | Goat anti- GFAP                    | Abcam          | ab53554    | 1:500    | TBS- 0.3% Tx100- 10% NDS | TBS- 0.3% Tx100- 10% NDS |
| <b>A<math>\beta</math></b>  | Mouse anti- $\beta$ - amyloid      | Merck          | 05-831-I   | 1:1,000  | TBS- 0.3% Tx100- 10% NDS | TBS- 0.3% Tx100- 10% NDS |
| <b>A<math>\beta</math></b>  | Rabbit anti- $\beta$ - amyloid     | Cell Signaling | 2454       | 1:250    | TBS- 0.3% Tx100- 10% NDS | TBS- 0.3% Tx100- 10% NDS |
| <b>Tau</b>                  | Mouse anti- Tau                    | Cell Signaling | 4019       | 1:800    | TBS- 0.3% Tx100- 10% NDS | TBS- 0.3% Tx100- 10% NDS |
| <b>Tau</b>                  | Rabbit anti-Tau                    | Cell Signaling | 46687      | 1:100    | TBS- 0.3% Tx100- 10% NDS | TBS- 0.3% Tx100- 10% NDS |
| <b>ADAP1</b>                | Goat anti- Centaurin alpha 1       | Abcam          | ab27476    | 1:50     | TBS- 0.3% Tx100- 10% NDS | TBS- 0.3% Tx100- 10% NDS |
| <b>CEND1</b>                | Rabbit anti- CEND1                 | Abcam          | ab113076   | 1:250    | TBS- 0.3% Tx100- 10% NDS | TBS- 0.3% Tx100- 10% NDS |
| <b>ANXA1</b>                | Rabbit anti- Annexin A1            | Invitrogen     | 71-3400    | 1:50     | TBS- 0.3% Tx100- 10% NDS | TBS- 0.3% Tx100- 10% NDS |
| <b>ANXA2</b>                | Rabbit anti- Annexin A2            | Abcam          | ab32571    | 1:100    | TBS- 0.3% Tx100- 10% NDS | TBS- 0.3% Tx100          |
| <b>ANXA5</b>                | Mouse anti- Annexin A5             | Santa Cruz     | sc-74438   | 1:50     | TBS- 0.3% Tx100- 10% NDS | TBS- 0.3% Tx100- 5% NDS  |
| <b>CLIC1</b>                | Rabbit anti- CLICL1                | Abcam          | ab229917   | 1:50     | TBS- 0.3% Tx100- 10% NDS | TBS- 0.3% Tx100- 10% NDS |
| <b>PRDX6</b>                | Rabbit anti-PRDX6                  | Abcam          | ab59543    | 1:100    | TBS+0.3% TX-100 +10% NDS | TBS- 0.3% Tx100          |
