# Supplementary material for: Human amygdala involvement in Alzheimer's disease revealed by stereological and dia‐PASEF analysis
Source: PubMed Central journal article supplement (PMC10467039; doi:10.1111/bpa.13180), 2023-06-18
Supplement: BPA-33-e13180-s009.pdf [file BPA-33-e13180-s009.pdf]

**Online Resource 7. GFAP stereological quantification data.**

**Table a.** Cortical nucleus GFAP stereological quantification data.

|                      | <i>Total Markers Counted</i> | <i>Number of Sections</i> | <i>Number of Sampling Sites</i> | <i>Coefficient of Error (Gundersen). m=1</i> | <i>Counting Frame Area (XY) (<math>\mu\text{m}^2</math>)</i> | <i>Sampling Grid Area (XY) (<math>\mu\text{m}^2</math>)</i> | <i>Estimated Population using Mean Section Thickness with Counts</i> | <i>Measured Volume (<math>\text{mm}^3</math>)</i> | <i>Numerical Density (<math>\text{cell}/\text{mm}^3</math>)</i> |
|----------------------|------------------------------|---------------------------|---------------------------------|----------------------------------------------|--------------------------------------------------------------|-------------------------------------------------------------|----------------------------------------------------------------------|---------------------------------------------------|-----------------------------------------------------------------|
| <b><i>AD</i></b>     |                              |                           |                                 |                                              |                                                              |                                                             |                                                                      |                                                   |                                                                 |
| 1                    | 98                           | 4                         | 215                             | 0.1                                          | 2500                                                         | 202500                                                      | 166278.77                                                            | 26.81                                             | 6202.51                                                         |
| 2                    | 154                          | 4                         | 150                             | 0.08                                         | 2500                                                         | 160000                                                      | 204543.64                                                            | 14.71                                             | 13901.77                                                        |
| 3                    | 142                          | 4                         | 123                             | 0.09                                         | 2500                                                         | 250000                                                      | 295359.91                                                            | 19.73                                             | 14969.11                                                        |
| 4                    | 107                          | 3                         | 82                              | 0.1                                          | 2500                                                         | 360000                                                      | 291553.41                                                            | 18.24                                             | 15983.85                                                        |
| 5                    | 120                          | 4                         | 73                              | 0.09                                         | 2500                                                         | 640000                                                      | 560155.25                                                            | 28.78                                             | 19461.73                                                        |
| 6                    | 136                          | 4                         | 114                             | 0.09                                         | 2500                                                         | 250000                                                      | 249110.84                                                            | 16.77                                             | 14856.32                                                        |
| 7                    | 148                          | 4                         | 161                             | 0.09                                         | 2500                                                         | 160000                                                      | 189120.06                                                            | 15.61                                             | 12114.84                                                        |
| 8                    | 108                          | 3                         | 91                              | 0.1                                          | 2500                                                         | 250000                                                      | 215612.59                                                            | 14.28                                             | 15096.49                                                        |
| 9                    | 131                          | 4                         | 99                              | 0.09                                         | 2500                                                         | 360000                                                      | 326586.53                                                            | 21.94                                             | 14886.46                                                        |
| 10                   | 122                          | 4                         | 154                             | 0.09                                         | 2500                                                         | 202500                                                      | 212781.05                                                            | 19.66                                             | 10824.81                                                        |
| <b><i>Non-AD</i></b> |                              |                           |                                 |                                              |                                                              |                                                             |                                                                      |                                                   |                                                                 |
| 20                   | 100                          | 4                         | 211                             | 0.1                                          | 2500                                                         | 250000                                                      | 187738.31                                                            | 33.70                                             | 5571.30                                                         |
| 21                   | 110                          | 4                         | 185                             | 0.1                                          | 2500                                                         | 250000                                                      | 228132.63                                                            | 27.92                                             | 8170.47                                                         |
| 22                   | 112                          | 4                         | 243                             | 0.1                                          | 2500                                                         | 160000                                                      | 170560.41                                                            | 23.66                                             | 7208.66                                                         |
| 23                   | 125                          | 4                         | 188                             | 0.09                                         | 2500                                                         | 160000                                                      | 152548.56                                                            | 18.83                                             | 8101.06                                                         |
| 24                   | 128                          | 4                         | 324                             | 0.09                                         | 2500                                                         | 160000                                                      | 146563.95                                                            | 32.26                                             | 4542.77                                                         |
| 25                   | 117                          | 4                         | 94                              | 0.1                                          | 2500                                                         | 422500                                                      | 418184.72                                                            | 23.24                                             | 17992.32                                                        |
| 26                   | 110                          | 4                         | 122                             | 0.1                                          | 2500                                                         | 250000                                                      | 203388.19                                                            | 18.78                                             | 10832.87                                                        |
| 27                   | 217                          | 4                         | 438                             | 0.07                                         | 2500                                                         | 40000                                                       | 143345.16                                                            | 24.65                                             | 5815.50                                                         |
| 28                   | 128                          | 4                         | 349                             | 0.09                                         | 2500                                                         | 122500                                                      | 130156.94                                                            | 26.79                                             | 4859.30                                                         |

**Table b.** Basomedial nucleus GFAP stereological quantification data.

|                      | <i>Total Markers Counted</i> | <i>Number of Sections</i> | <i>Number of Sampling Sites</i> | <i>Coefficient of Error (Gundersen). m=1</i> | <i>Counting Frame Area (XY) (<math>\mu\text{m}^2</math>)</i> | <i>Sampling Grid Area (XY) (<math>\mu\text{m}^2</math>)</i> | <i>Estimated Population using Mean Section Thickness with Counts</i> | <i>Measured Volume (<math>\text{mm}^3</math>)</i> | <i>Numerical Density (cell/<math>\text{mm}^3</math>)</i> |
|----------------------|------------------------------|---------------------------|---------------------------------|----------------------------------------------|--------------------------------------------------------------|-------------------------------------------------------------|----------------------------------------------------------------------|---------------------------------------------------|----------------------------------------------------------|
| <b><i>AD</i></b>     |                              |                           |                                 |                                              |                                                              |                                                             |                                                                      |                                                   |                                                          |
| 1                    | 96                           | 4                         | 148                             | 0.1                                          | 2500                                                         | 422500                                                      | 368178.72                                                            | 40.40                                             | 9113.76                                                  |
| 2                    | 103                          | 4                         | 183                             | 0.1                                          | 2500                                                         | 90000                                                       | 73934.46                                                             | 9.86                                              | 7499.72                                                  |
| 3                    | 118                          | 4                         | 82                              | 0.09                                         | 2500                                                         | 250000                                                      | 255008.05                                                            | 12.68                                             | 20114.85                                                 |
| 4                    | 107                          | 4                         | 127                             | 0.1                                          | 2500                                                         | 360000                                                      | 291439.06                                                            | 30.07                                             | 9692.38                                                  |
| 5                    | 144                          | 4                         | 66                              | 0.09                                         | 2500                                                         | 640000                                                      | 678869.06                                                            | 26.27                                             | 25846.42                                                 |
| 6                    | 119                          | 4                         | 108                             | 0.09                                         | 2500                                                         | 160000                                                      | 144979.41                                                            | 10.27                                             | 14121.74                                                 |
| 7                    | 305                          | 4                         | 268                             | 0.06                                         | 2500                                                         | 62500                                                       | 153734.11                                                            | 10.14                                             | 15155.77                                                 |
| 8                    | 144                          | 4                         | 107                             | 0.08                                         | 2500                                                         | 202500                                                      | 232144.41                                                            | 13.62                                             | 17045.75                                                 |
| 9                    | 143                          | 4                         | 137                             | 0.09                                         | 2500                                                         | 202500                                                      | 204493.13                                                            | 16.96                                             | 12056.38                                                 |
| 10                   | 207                          | 4                         | 259                             | 0.07                                         | 2500                                                         | 90000                                                       | 161628.16                                                            | 14.61                                             | 11062.69                                                 |
| <b><i>Non-AD</i></b> |                              |                           |                                 |                                              |                                                              |                                                             |                                                                      |                                                   |                                                          |
| 19                   | 169                          | 4                         | 2337                            | 0.09                                         | 2500                                                         | 10000                                                       | 12862.49                                                             | 14.14                                             | 909.61                                                   |
| 20                   | 116                          | 4                         | 355                             | 0.1                                          | 2500                                                         | 160000                                                      | 140537.48                                                            | 36.02                                             | 3902.05                                                  |
| 21                   | 97                           | 4                         | 108                             | 0.1                                          | 2500                                                         | 490000                                                      | 392190.97                                                            | 33.88                                             | 11577.29                                                 |
| 22                   | 100                          | 4                         | 294                             | 0.1                                          | 2500                                                         | 202500                                                      | 176058.45                                                            | 37.01                                             | 4757.65                                                  |
| 23                   | 103                          | 4                         | 289                             | 0.1                                          | 2500                                                         | 90000                                                       | 70286.2                                                              | 16.19                                             | 4342.35                                                  |
| 24                   | 103                          | 4                         | 1860                            | 0.1                                          | 2500                                                         | 15625                                                       | 11638.07                                                             | 17.92                                             | 649.37                                                   |
| 25                   | 103                          | 4                         | 125                             | 0.1                                          | 2500                                                         | 250000                                                      | 214280.98                                                            | 19.56                                             | 10952.99                                                 |
| 26                   | 126                          | 4                         | 453                             | 0.09                                         | 2500                                                         | 62500                                                       | 60627.76                                                             | 17.57                                             | 3450.07                                                  |
| 27                   | 118                          | 4                         | 564                             | 0.09                                         | 2500                                                         | 40000                                                       | 34097.06                                                             | 13.95                                             | 2444.74                                                  |
| 28                   | 176                          | 4                         | 1203                            | 0.08                                         | 2500                                                         | 22500                                                       | 31177.46                                                             | 16.70                                             | 1867.07                                                  |

**Table c.** Basolateral nucleus GFAP stereological quantification data.

|                      | <i>Total Markers Counted</i> | <i>Number of Sections</i> | <i>Number of Sampling Sites</i> | <i>Coefficient of Error (Gundersen). m=1</i> | <i>Counting Frame Area (XY) (<math>\mu\text{m}^2</math>)</i> | <i>Sampling Grid Area (XY) (<math>\mu\text{m}^2</math>)</i> | <i>Estimated Population using Mean Section Thickness with Counts</i> | <i>Measured Volume (<math>\text{mm}^3</math>)</i> | <i>Numerical Density (<math>\text{cell}/\text{mm}^3</math>)</i> |
|----------------------|------------------------------|---------------------------|---------------------------------|----------------------------------------------|--------------------------------------------------------------|-------------------------------------------------------------|----------------------------------------------------------------------|---------------------------------------------------|-----------------------------------------------------------------|
| <b><i>AD</i></b>     |                              |                           |                                 |                                              |                                                              |                                                             |                                                                      |                                                   |                                                                 |
| <i>1</i>             | 111                          | 4                         | 221                             | 0.1                                          | 2500                                                         | 562500                                                      | 539383.38                                                            | 79.12                                             | 6817.54                                                         |
| <i>2</i>             | 109                          | 4                         | 147                             | 0.1                                          | 2500                                                         | 490000                                                      | 424489.09                                                            | 44.14                                             | 9617.03                                                         |
| <i>3</i>             | 135                          | 4                         | 125                             | 0.09                                         | 2500                                                         | 640000                                                      | 744446.81                                                            | 50.16                                             | 14842.27                                                        |
| <i>4</i>             | 145                          | 4                         | 316                             | 0.08                                         | 2500                                                         | 490000                                                      | 531520                                                               | 98.90                                             | 5374.14                                                         |
| <i>5</i>             | 138                          | 4                         | 99                              | 0.09                                         | 2500                                                         | 1210000                                                     | 1260234.75                                                           | 73.97                                             | 17036.92                                                        |
| <i>6</i>             | 165                          | 4                         | 200                             | 0.08                                         | 2500                                                         | 250000                                                      | 313094.78                                                            | 30.55                                             | 10250.21                                                        |
| <i>7</i>             | 150                          | 4                         | 142                             | 0.09                                         | 2500                                                         | 562500                                                      | 678391.69                                                            | 50.76                                             | 13365.45                                                        |
| <i>8</i>             | 140                          | 4                         | 130                             | 0.09                                         | 2500                                                         | 640000                                                      | 715452.25                                                            | 54.26                                             | 13185.53                                                        |
| <i>9</i>             | 140                          | 4                         | 161                             | 0.09                                         | 2500                                                         | 640000                                                      | 639029.19                                                            | 64.91                                             | 9844.85                                                         |
| <i>10</i>            | 127                          | 4                         | 162                             | 0.09                                         | 2500                                                         | 490000                                                      | 549225                                                               | 51.10                                             | 10748.67                                                        |
| <b><i>Non-AD</i></b> |                              |                           |                                 |                                              |                                                              |                                                             |                                                                      |                                                   |                                                                 |
| <i>19</i>            | 104                          | 4                         | 729                             | 0.1                                          | 2500                                                         | 160000                                                      | 143050.55                                                            | 74.29                                             | 1925.50                                                         |
| <i>20</i>            | 109                          | 4                         | 420                             | 0.1                                          | 2500                                                         | 360000                                                      | 299752.56                                                            | 95.92                                             | 3124.96                                                         |
| <i>21</i>            | 119                          | 4                         | 121                             | 0.1                                          | 2500                                                         | 810000                                                      | 777483.19                                                            | 61.49                                             | 12643.59                                                        |
| <i>22</i>            | 113                          | 4                         | 275                             | 0.1                                          | 2500                                                         | 360000                                                      | 404893.06                                                            | 63.21                                             | 6405.49                                                         |
| <i>23</i>            | 101                          | 4                         | 245                             | 0.1                                          | 2500                                                         | 490000                                                      | 386933.78                                                            | 76.26                                             | 5074.10                                                         |
| <i>24</i>            | 135                          | 4                         | 4293                            | 0.1                                          | 2500                                                         | 22500                                                       | 23010.16                                                             | 60.92                                             | 377.68                                                          |
| <i>25</i>            | 104                          | 4                         | 177                             | 0.1                                          | 2500                                                         | 490000                                                      | 440181.28                                                            | 53.58                                             | 8214.78                                                         |
| <i>26</i>            | 113                          | 4                         | 158                             | 0.1                                          | 2500                                                         | 640000                                                      | 566990.13                                                            | 65.20                                             | 8696.55                                                         |
| <i>27</i>            | 129                          | 4                         | 374                             | 0.09                                         | 2500                                                         | 250000                                                      | 251255.75                                                            | 58.14                                             | 4321.57                                                         |
| <i>28</i>            | 149                          | 4                         | 1230                            | 0.09                                         | 2500                                                         | 90000                                                       | 108668.56                                                            | 69.83                                             | 1556.22                                                         |

**Table d.** Lateral nucleus GFAP stereological quantification data.

|                      | <i>Total Markers Counted</i> | <i>Number of Sections</i> | <i>Number of Sampling Sites</i> | <i>Coefficient of Error (Gundersen). m=1</i> | <i>Counting Frame Area (XY) (<math>\mu\text{m}^2</math>)</i> | <i>Sampling Grid Area (XY) (<math>\mu\text{m}^2</math>)</i> | <i>Estimated Population using Mean Section Thickness with Counts</i> | <i>Measured Volume (<math>\text{mm}^3</math>)</i> | <i>Numerical Density (<math>\text{cell}/\text{mm}^3</math>)</i> |
|----------------------|------------------------------|---------------------------|---------------------------------|----------------------------------------------|--------------------------------------------------------------|-------------------------------------------------------------|----------------------------------------------------------------------|---------------------------------------------------|-----------------------------------------------------------------|
| <b><i>AD</i></b>     |                              |                           |                                 |                                              |                                                              |                                                             |                                                                      |                                                   |                                                                 |
| 1                    | 190                          | 4                         | 239                             | 0.08                                         | 2500                                                         | 250000                                                      | 717146.19                                                            | 64.62                                             | 11098.50                                                        |
| 2                    | 152                          | 4                         | 199                             | 0.09                                         | 2500                                                         | 810000                                                      | 766359.81                                                            | 81.76                                             | 9373.65                                                         |
| 3                    | 94                           | 4                         | 91                              | 0.1                                          | 2500                                                         | 810000                                                      | 839913.06                                                            | 57.90                                             | 14506.87                                                        |
| 4                    | 124                          | 4                         | 142                             | 0.09                                         | 2500                                                         | 490000                                                      | 1110507.38                                                           | 112.42                                            | 9877.94                                                         |
| 5                    | 98                           | 4                         | 58                              | 0.1                                          | 2500                                                         | 640000                                                      | 1574430.25                                                           | 87.45                                             | 18004.68                                                        |
| 6                    | 239                          | 4                         | 340                             | 0.07                                         | 2500                                                         | 160000                                                      | 865646.44                                                            | 105.03                                            | 8241.90                                                         |
| 7                    | 198                          | 4                         | 177                             | 0.08                                         | 2500                                                         | 810000                                                      | 1596515.63                                                           | 114.52                                            | 13940.45                                                        |
| 8                    | 142                          | 4                         | 141                             | 0.09                                         | 2500                                                         | 1440000                                                     | 1155604.5                                                            | 92.27                                             | 12524.60                                                        |
| 9                    | 163                          | 4                         | 223                             | 0.09                                         | 2500                                                         | 490000                                                      | 660617.06                                                            | 79.20                                             | 8340.98                                                         |
| 10                   | 207                          | 4                         | 259                             | 0.08                                         | 2500                                                         | 360000                                                      | 814232.06                                                            | 92.48                                             | 8804.87                                                         |
| <b><i>Non-AD</i></b> |                              |                           |                                 |                                              |                                                              |                                                             |                                                                      |                                                   |                                                                 |
| 19                   | 105                          | 4                         | 841                             | 0.1                                          | 2500                                                         | 422500                                                      | 233614.55                                                            | 135.05                                            | 1729.89                                                         |
| 20                   | 103                          | 4                         | 291                             | 0.1                                          | 2500                                                         | 640000                                                      | 654654.38                                                            | 154.38                                            | 4240.62                                                         |
| 21                   | 134                          | 4                         | 164                             | 0.09                                         | 2500                                                         | 1000000                                                     | 858425.63                                                            | 82.56                                             | 10398.08                                                        |
| 22                   | 137                          | 4                         | 293                             | 0.09                                         | 2500                                                         | 1210000                                                     | 639179.5                                                             | 90.24                                             | 7083.02                                                         |
| 23                   | 147                          | 4                         | 300                             | 0.08                                         | 2500                                                         | 2250000                                                     | 759134.63                                                            | 124.42                                            | 6101.19                                                         |
| 24                   | 126                          | 4                         | 1364                            | 0.09                                         | 2500                                                         | 490000                                                      | 160849.98                                                            | 138.70                                            | 1159.72                                                         |
| 25                   | 117                          | 4                         | 203                             | 0.09                                         | 2500                                                         | 1000000                                                     | 797201.56                                                            | 108.14                                            | 7372.08                                                         |
| 26                   | 138                          | 4                         | 170                             | 0.09                                         | 2500                                                         | 1000000                                                     | 1563261                                                              | 154.95                                            | 10088.68                                                        |
| 27                   | 151                          | 4                         | 300                             | 0.08                                         | 2500                                                         | 562500                                                      | 577616.94                                                            | 95.60                                             | 6042.20                                                         |
| 28                   | 111                          | 4                         | 476                             | 0.1                                          | 2500                                                         | 640000                                                      | 328507.84                                                            | 109.44                                            | 3001.74                                                         |
