# Supplementary material for: Human amygdala involvement in Alzheimer's disease revealed by stereological and dia‐PASEF analysis
Source: PubMed Central journal article supplement (PMC10467039; doi:10.1111/bpa.13180), 2023-06-18
Supplement: BPA-33-e13180-s010.pdf [file BPA-33-e13180-s010.pdf]

**Online Resource 8. A $\beta$  stereological quantification data.**

**Table a.** Cortical nucleus A $\beta$  stereological quantification data.

|                  | <i>Marker Count</i> | <i>Number of Sections</i> | <i>Number of Sampling Sites</i> | <i>Coefficient of Error (Gundersen). m=1</i> | <i>Counting Frame Area (XY) (<math>\mu\text{m}^2</math>)</i> | <i>Sampling Grid Area (XY) (<math>\mu\text{m}^2</math>)</i> | <i>Grid Spacing (<math>\mu\text{m}</math>)</i> | <i>Area Fraction</i> |
|------------------|---------------------|---------------------------|---------------------------------|----------------------------------------------|--------------------------------------------------------------|-------------------------------------------------------------|------------------------------------------------|----------------------|
| <b><i>AD</i></b> |                     |                           |                                 |                                              |                                                              |                                                             |                                                |                      |
| <i>1</i>         | 141                 | 4                         | 95                              | 0.027                                        | 40000                                                        | 490000                                                      | 40                                             | 0.0717               |
| <i>2</i>         | 65                  | 3                         | 17                              | 0.041                                        | 40000                                                        | 1562500                                                     | 40                                             | 0.1857               |
| <i>3</i>         | 60                  | 4                         | 21                              | 0.044                                        | 40000                                                        | 2250000                                                     | 40                                             | 0.1245               |
| <i>4</i>         | 65                  | 3                         | 23                              | 0.064                                        | 40000                                                        | 1440000                                                     | 40                                             | 0.1474               |
| <i>5</i>         | 53                  | 4                         | 26                              | 0.044                                        | 40000                                                        | 2250000                                                     | 40                                             | 0.0971               |
| <i>6</i>         | 45                  | 3                         | 13                              | 0.051                                        | 40000                                                        | 2250000                                                     | 40                                             | 0.1385               |
| <i>7</i>         | 54                  | 4                         | 32                              | 0.053                                        | 40000                                                        | 1000000                                                     | 40                                             | 0.0897               |
| <i>8</i>         | 19                  | 4                         | 17                              | 0.095                                        | 40000                                                        | 2250000                                                     | 40                                             | 0.0554               |
| <i>9</i>         | 43                  | 3                         | 13                              | 0.058                                        | 40000                                                        | 2250000                                                     | 40                                             | 0.1552               |
| <i>10</i>        | 79                  | 4                         | 38                              | 0.043                                        | 40000                                                        | 1000000                                                     | 40                                             | 0.1006               |

**Table b.** Basomedial nucleus A $\beta$  stereological quantification data.

|                  | <i>Marker Count</i> | <i>Number of Sections</i> | <i>Number of Sampling Sites</i> | <i>Coefficient of Error (Gundersen). <math>m=1</math></i> | <i>Counting Frame Area (XY) (<math>\mu\text{m}^2</math>)</i> | <i>Sampling Grid Area (XY) (<math>\mu\text{m}^2</math>)</i> | <i>Grid Spacing (<math>\mu\text{m}</math>)</i> | <i>Area Fraction</i> |
|------------------|---------------------|---------------------------|---------------------------------|-----------------------------------------------------------|--------------------------------------------------------------|-------------------------------------------------------------|------------------------------------------------|----------------------|
| <b><i>AD</i></b> |                     |                           |                                 |                                                           |                                                              |                                                             |                                                |                      |
| <i>1</i>         | 85                  | 4                         | 66                              | 0.036                                                     | 40000                                                        | 1000000                                                     | 40                                             | 0.0587               |
| <i>2</i>         | 95                  | 4                         | 29                              | 0.03                                                      | 40000                                                        | 810000                                                      | 40                                             | 0.1457               |
| <i>3</i>         | 27                  | 4                         | 14                              | 0.066                                                     | 40000                                                        | 2250000                                                     | 40                                             | 0.0888               |
| <i>4</i>         | 52                  | 3                         | 18                              | 0.062                                                     | 40000                                                        | 2250000                                                     | 40                                             | 0.1354               |
| <i>5</i>         | 51                  | 4                         | 22                              | 0.043                                                     | 40000                                                        | 2250000                                                     | 40                                             | 0.1028               |
| <i>6</i>         | 19                  | 4                         | 8                               | 0.098                                                     | 40000                                                        | 2250000                                                     | 40                                             | 0.125                |
| <i>7</i>         | 39                  | 4                         | 19                              | 0.062                                                     | 40000                                                        | 1000000                                                     | 40                                             | 0.097                |
| <i>8</i>         | 27                  | 4                         | 13                              | 0.087                                                     | 40000                                                        | 2250000                                                     | 40                                             | 0.0982               |
| <i>9</i>         | 29                  | 4                         | 12                              | 0.063                                                     | 40000                                                        | 2250000                                                     | 40                                             | 0.101                |
| <i>10</i>        | 67                  | 4                         | 31                              | 0.041                                                     | 40000                                                        | 1000000                                                     | 40                                             | 0.1012               |

**Table c.** Basolateral nucleus A $\beta$  stereological quantification data.

|                  | <i>Marker Count</i> | <i>Number of Sections</i> | <i>Number of Sampling Sites</i> | <i>Coefficient of Error (Gundersen). m=1</i> | <i>Counting Frame Area (XY) (<math>\mu\text{m}^2</math>)</i> | <i>Sampling Grid Area (XY) (<math>\mu\text{m}^2</math>)</i> | <i>Grid Spacing (<math>\mu\text{m}</math>)</i> | <i>Area Fraction</i> |
|------------------|---------------------|---------------------------|---------------------------------|----------------------------------------------|--------------------------------------------------------------|-------------------------------------------------------------|------------------------------------------------|----------------------|
| <b><i>AD</i></b> |                     |                           |                                 |                                              |                                                              |                                                             |                                                |                      |
| <i>1</i>         | 51                  | 4                         | 92                              | 0.055                                        | 40000                                                        | 2250000                                                     | 40                                             | 0.025                |
| <i>2</i>         | 96                  | 4                         | 54                              | 0.039                                        | 40000                                                        | 2250000                                                     | 40                                             | 0.0789               |
| <i>3</i>         | 61                  | 4                         | 24                              | 0.046                                        | 40000                                                        | 4000000                                                     | 40                                             | 0.1068               |
| <i>4</i>         | 40                  | 3                         | 19                              | 0.064                                        | 40000                                                        | 6250000                                                     | 40                                             | 0.0855               |
| <i>5</i>         | 85                  | 4                         | 46                              | 0.037                                        | 40000                                                        | 3062500                                                     | 40                                             | 0.0819               |
| <i>6</i>         | 34                  | 4                         | 15                              | 0.078                                        | 40000                                                        | 4000000                                                     | 40                                             | 0.1073               |
| <i>7</i>         | 28                  | 4                         | 20                              | 0.072                                        | 40000                                                        | 4000000                                                     | 40                                             | 0.061                |
| <i>8</i>         | 34                  | 4                         | 14                              | 0.068                                        | 40000                                                        | 6250000                                                     | 40                                             | 0.1009               |
| <i>9</i>         | 42                  | 4                         | 19                              | 0.063                                        | 40000                                                        | 6250000                                                     | 40                                             | 0.0995               |
| <i>10</i>        | 87                  | 4                         | 46                              | 0.053                                        | 40000                                                        | 2250000                                                     | 40                                             | 0.0921               |

**Table d.** Lateral nucleus A $\beta$  stereological quantification data.

|                  | <i>Marker Count</i> | <i>Number of Sections</i> | <i>Number of Sampling Sites</i> | <i>Coefficient of Error (Gundersen). m=1</i> | <i>Counting Frame Area (XY) (<math>\mu\text{m}^2</math>)</i> | <i>Sampling Grid Area (XY) (<math>\mu\text{m}^2</math>)</i> | <i>Grid spacing (<math>\mu\text{m}</math>)</i> | <i>Area Fraction</i> |
|------------------|---------------------|---------------------------|---------------------------------|----------------------------------------------|--------------------------------------------------------------|-------------------------------------------------------------|------------------------------------------------|----------------------|
| <b><i>AD</i></b> |                     |                           |                                 |                                              |                                                              |                                                             |                                                |                      |
| <i>1</i>         | 204                 | 4                         | 139                             | 0.026                                        | 40000                                                        | 810000                                                      | 40                                             | 0.0639               |
| <i>2</i>         | 80                  | 4                         | 58                              | 0.045                                        | 40000                                                        | 2250000                                                     | 40                                             | 0.0634               |
| <i>3</i>         | 36                  | 4                         | 27                              | 0.057                                        | 40000                                                        | 4000000                                                     | 40                                             | 0.0551               |
| <i>4</i>         | 26                  | 3                         | 24                              | 0.079                                        | 40000                                                        | 6250000                                                     | 40                                             | 0.0538               |
| <i>5</i>         | 38                  | 4                         | 37                              | 0.062                                        | 40000                                                        | 4000000                                                     | 40                                             | 0.0431               |
| <i>6</i>         | 49                  | 4                         | 30                              | 0.049                                        | 40000                                                        | 6250000                                                     | 40                                             | 0.0725               |
| <i>7</i>         | 38                  | 4                         | 21                              | 0.063                                        | 40000                                                        | 9000000                                                     | 40                                             | 0.0792               |
| <i>8</i>         | 41                  | 4                         | 16                              | 0.053                                        | 40000                                                        | 9000000                                                     | 40                                             | 0.1111               |
| <i>9</i>         | 39                  | 4                         | 22                              | 0.096                                        | 40000                                                        | 6250000                                                     | 40                                             | 0.0901               |
| <i>10</i>        | 41                  | 4                         | 40                              | 0.054                                        | 40000                                                        | 4000000                                                     | 40                                             | 0.0422               |
